# Supplementary material for: Plant-Associated Representatives of the <em>Bacillus cereus</em> Group Harbor a Rich Biosynthetic Potential of Antimicrobial Compounds and are Efficient in Suppressing Plant Pathogens
Source: Preprints.org preprint supplement (doi:10.20944/preprints202310.0635.v2), 2023-10-11
Supplement: Supplementary file 1 [file supplementary]

## Sheet: Table S1
Suppl. Table S1: Types of entomocidal Cy toxins
Cry1Aa1 - 24	Cry1Nb1	Cry7Ka1	Cry14Aa1	Cry32Ca1	Cry43Ca1	Cry74Aa1
Cry1Ab1 - 35	Cry2Aa1 - 18	Cry7Kb1	Cry14Ab1	Cry32Cb1	Cry43Cb1
Cry1Ac1 - 38	Cry2Ab1 - 34	Cry7La1	Cry15Aa1	Cry32Da1	Cry43Cc1	Cyt toxins
Cry1Ad1 - 2	Cry2Ac1 - 12	Cry8Aa1	Cry16Aa1	Cry32Ea1 - 2	Cry44Aa1	Cyt1Aa1 - 7
Cry1Ae1	Cry2Ad1 - 5	Cry8Ab1	Cry17Aa1	Cry32Eb1	Cry45Aa1	Cyt1Ab1
Cry1Af1	Cry2Ae1	Cry8Ac1	Cry18Aa1	Cry32Fa1	Cry45Ba1	Cyt1Ba1
Cry1Ag1	Cry2Af1 - 2	Cry8Ad1	Cry18Ba1	Cry32Ga1	Cry46Aa1 - 2	Cyt1Ca1
Cry1Ah1 - 3	Cry2Ag1	Cry8Ba1	Cry18Ca1	Cry32Ha1	Cry46Ab1	Cyt1Da1 - 2
Cry1Ai1 - 2	Cry2Ah1 - 6	Cry8Bb1	Cry19Aa1	Cry32Hb1	Cry47Aa1	Cyt2Aa1 - 4
Cry1Aj1	Cry2Ai1	Cry8Bc1	Cry19Ba1	Cry32Ia1	Cry48Aa1 - 3	Cyt2Ba1 - 15
Cry1Ba1 - 8	Cry2Aj1	Cry8Ca1 - 4	Cry19Ca1	Cry32Ja1	Cry48Ab1 - 2	Cyt2Bb1
Cry1Bb1 - 3	Cry2Ak1	Cry8Da1 - 3	Cry20Aa1	Cry32Ka1	Cry49Aa1 - 4	Cyt2Bc1
Cry1Bc1	Cry2Al1	Cry8Db1	Cry20Ba1 - 2	Cry32La1	Cry49Ab1	Cyt2Ca1
Cry1Bd1 - 3	Cry2Ba1 - 2	Cry8Ea1 - 6	Cry21Aa1 - 2	Cry32Ma1	Cry50Aa1	Cyt3Aa1
Cry1Be1 – 5	Cry3Aa1 - 12	Cry8Fa1 - 4	Cry21Ba1	Cry32Mb1	Cry50Ba1 - 2	Vip toxins
Cry1Bf1 – 2	Cry3Ba – 3	Cry8Ga1 – 3	Cry21Ca1 – 2	Cry32Na1	Cry51Aa1 - 2	Vip1Aa1 - 3
Cry1Bg1	Cry3Bb1 – 3	Cry8Ha1	Cry21Da1	Cry32Oa1	Cry52Aa1	Vip1Ab1
Cry1Bh1	Cry3Ca1	Cry8Hb1	Cry21Ea1	Cry32Pa1	Cry52Ba1	Vip1Ac1
Cry1Bi1	Cry4Aa1 – 4	Cry8Ia1 – 4	Cry21Fa1	Cry32Qa1	Cry52Ca1	Vip1Ad1
Cry1Bj1	Cry4Ba1 – 5	Cry8Ib1 – 3	Cry21Ga1	Cry32Ra1	Cry53Aa1	Vip1Ba1 – 2
Cry1Ca1 - 14	Cry4Ca1 - 2	Cry8Ja1	Cry21Ha1	Cry32Sa1	Cry53Ab1	Vip1Bb1 – 3
Cry1Cb1 - 3	Cry4Cb1 - 3	Cry8Ka1 - 3	Cry22Aa1 - 3	Cry32Ta1	Cry54Aa1 – 2	Vip1Bc1
Cry1Da1 - 4	Cry4Cc1	Cry8Kb1 - 3	Cry22Ab1 - 2	Cry32Ua1	Cry54Ab1	Vip1Ca1 - 2
Cry1Db1 - 2	Cry5Aa1	Cry8La1	Cry22Ba1	Cry32Va1	Cry54Ba1 – 2	Vip1Da1
Cry1Dc1	Cry5Ab1	Cry8Ma1 - 3	Cry22Bb1	Cry32Wa1 - 2	Cry55Aa1 - 3	Vip2Aa1 - 3
Cry1Dd1	Cry5Ac1	Cry8Na1	Cry23Aa1	Cry32Xa1	Cry56Aa1 - 4	Vip2Ab1
Cry1Ea1 - 12	Cry5Ad1	Cry8Pa1 - 3	Cry24Aa1	Cry32Ya1	Cry57Aa1	Vip2Ac1 - 2
Cry1Eb1	Cry5Ba1 - 3	Cry8Qa1 - 2	Cry24Ba1	Cry33Aa1	Cry57Ab1	Vip2Ad1
Cry1Fa1 - 4	Cry5Ca1 - 2	Cry8Ra1	Cry24Ca1	Cry34Aa1 - 4	Cry58Aa1	Vip2Ae1 - 3
Cry1Fb1 - 7	Cry5Da1 - 2	Cry8Sa1	Cry24Da1	Cry34Ab1	Cry59Aa1	Vip2Af1 - 2
Cry1Ga1 - 2	Cry5Ea1 - 2	Cry8Ta1	Cry25Aa1	Cry34Ac1 - 3	Cry59Ba1	Vip2Ag1 - 2
Cry1Gb1 - 2	Cry6Aa1 - 3	Cry9Aa1 - 5	Cry26Aa1	Cry34Ba1 - 3	Cry60Aa1 - 3	Vip2Ba1 - 2
Cry1Gc1	Cry6Ba1	Cry9Ba1 - 2	Cry27Aa1	Cry35Aa1 - 4	Cry60Ba1 - 3	Vip2Bb1 - 4
Cry1Ha1	Cry7Aa1	Cry9Bb1	Cry28Aa1 - 2	Cry35Ab1 - 3	Cry61Aa1 - 3	Vip3Aa1 - 60
Cry1Hb1 - 2	Cry7Ab1 - 9	Cry9Ca1 - 2	Cry29Aa1	Cry35Ac1	Cry62Aa1	Vip3Ab1 - 2
Cry1Hc1	Cry7Ac1	Cry9Da1 - 4	Cry29Ba1	Cry35Ba1 - 3	Cry63Aa1	Vip3Ac1
Cry1Ia1 - 35	Cry7Ba1	Cry9Db1	Cry30Aa1	Cry36Aa1	Cry64Aa1	Vip3Ad1 - 5
Cry1Ib1 - 11	Cry7Bb1	Cry9Dc1	Cry30Ba1	Cry37Aa1	Cry64Ba1	Vip3Ae1
Cry1Ic1 - 2	Cry7Ca1	Cry9Ea1 - 10	Cry30Ca1 - 2	Cry38Aa1	Cry64Ca1	Vip3Af1 - 4
Cry1Id1 - 3	Cry7Cb1	Cry9Eb1 - 3	Cry30Da1	Cry39Aa1	Cry65Aa1 - 2	Vip3Ag1 - 15
Cry1Ie1 - 5	Cry7Da1 - 3	Cry9Ec1	Cry30Db1	Cry40Aa1	Cry66Aa1 - 2	Vip3Ah1
Cry1If1	Cry7Ea1 - 3	Cry9Ed1	Cry30Ea1 - 4	Cry40Ba1	Cry67Aa1 - 2	Vip3Ai1
Cry1Ig1	Cry7Fa1 - 2	Cry9Ee1 - 2	Cry30Fa1	Cry40Ca1	Cry68Aa1	Vip3Aj1 - 2
Cry1Ja1 - 3	Cry7Fb1 - 3	Cry9Fa1	Cry30Ga1 - 2	Cry40Da1	Cry69Aa1 - 2	Vip3Ba1 - 2
Cry1Jb1	Cry7Ga1 - 2	Cry9Ga1	Cry31Aa1 - 6	Cry41Aa1	Cry69Ab1	Vip3Bb1 - 3
Cry1Jc1 - 2	Cry7Gb1	Cry10Aa1 - 4	Cry31Ab1 - 2	Cry41Ab1	Cry70Aa1	Vip3Ca1 - 4
Cry1Jd1	Cry7Gc1	Cry11Aa1 - 4	Cry31Ac1 - 2	Cry41Ba1 - 2	Cry70Ba1	Vip4Aa1
Cry1Ka1 - 2	Cry7Gd1	Cry11Ba1	Cry31Ad1 - 2	Cry41Ca1	Cry70Bb1	Sip toxin
Cry1La1 - 3	Cry7Ha1	Cry11Bb1 - 2	Cry32Aa1 - 2	Cry42Aa1	Cry71Aa1	Sip1Aa1
Cry1Ma1 - 2	Cry7Ia1	Cry12Aa1	Cry32Ab1	Cry43Aa1 - 2	Cry72Aa1- 2
Cry1Na1 - 3	Cry7Ja1	Cry13Aa1-2	Cry32Ba1	Cry43Ba1	Cry73Aa1
Table 3. Known host spectrum of diﬀerent toxin proteins secreted by B. thuringiensis (Adapted from Palma et al., 2014)
Type of the toxin		Toxin proteins												Target group(s)
Crystal protein		Cry1A-K; Cry2A; Cry7B; Cry8D; Cry9A-C,E; Cry15A; Cry22A; Cry32A; Cry51A												Lepidoptera
		Cry1A-C; Cry2A; Cry4A-B; Cry10; Cry11A-B; Cry16A; Cry19A-B; Cry16A; Cry19A-B; Cry20A; Cry24C; Cry27A; Cry32B-D; Cry39A; Cry44A; Cry47A; Cry48A; Cry49A												Diptera
		Cry1B,I; Cry3A-C; Cry7A; Cry8A-G; Cry9D; Cry14A; Cry18A; Cry22A-B; Cry23A; Cry34A-B; Cry35A-B; Cry36A; Cry37A; Cry43A-B; Cry55A												Coleoptera
		Cry2A; Cry3A; Cry11A												Hemiptera
		Cry3A; Cry5A; Cry22A												Hymenoptera
		Cry5A-B; Cry6A-B; Cry12A; Cry13A; Cry14A; Cry21A; Cry55A												Rhabdi da
		Cry1Ab												Gastropoda
Cytoly c protein		Cyt1A-B; Cyt2A-B												Diptera
		Cyt1A; Cyt2C												Coleoptera
Vegeta ve insec cidal protein		Vip1; Vip2												Coleoptera &
														Hemiptera
		Vip3												Lepidoptera
Secreted insec cidal protein		Sip1												Coleoptera

## Sheet: Table S2
	Suppl. Table S2: Species and subspecies delineation of the 17 Vietnamese B. cereus sensu lato isolates according to their dDDH and Fast ANI values. Their classification according to the GTDB taxonomy is also presented.
	accession	RefSeq	species/subsp./strain	type strain (1)	dDDH, d4	FAST ANI	type strain (2)	dDDH, d4	FAST ANI	GTDB taxonomy	representative	type strain	number
	CP085501.1	GCF_006349735.2	B. cereus ssp.A (cereus) A24	Bacillus cereus ATCC 14579	85.3%	98.28	Bacillus bombysepticus (cereus) FORC087	76.5%	97.27	s__Bacillus_A cereus	GCA_000007825.1	ATCC 14579	310 genomes
				Bacillus thuringiensis ATCC 10792	71.8%		Bacillus bombysepticus Wang	76.0%
	CP085506.1	GCF_013284455.2	B. cereus ssp.A (cereus) HD2.4B	Bacillus cereus ATCC 14579	88.6%	98.64	Bacillus bombyepticus (cereus) FORC087	75.5%	96.95	s__Bacillus_A cereus	GCA_000007825.1	ATCC 14579	310 genomes
				Bacillus thuringiensis ATCC 10792	72.3%		Bacillus bombysepticus Wang	75.1%
	CP085510.1	GCF_013284505.2	B. cereus ssp.A (cereus) HD1.4B	Bacillus cereus ATCC 14579	88.6%	98.64	Bacillus bombysepticus (cereus) FORC087	75.5%	96.95	s__Bacillus_A cereus	GCA_000007825.1	ATCC 14579	310 genomes
				Bacillus thuringiensis ATCC 10792	72.3%		Bacillus bombysepticus Wang	75.1%
	JABSVB000000000.1	GCF_013284425.1	B. cereus ssp.A (cereus) HB3.1	Bacillus cereus ATCC 14579	89.6%	98.75	Bacillus bombyepticus (cereus) FORC087	75.0%	96.90	s__Bacillus_A cereus	GCA_000007825.1	ATCC 14579	310 genomes
				Bacillus thuringiensis ATCC 10792	71.4%		Bacillus bombysepticus Wang	74.7%
	VDDR00000000.1	GCF_006151815.1	B. cereus ssp.A (cereus) A8	Bacillus cereus ATCC 14579	90.2%	98.85	Bacillus bombysepticus (cereus) FORC087	74.4%	96.90	s__Bacillus_A cereus	GCA_000007825.1	ATCC 14579	310 genomes
				Bacillus thuringiensis ATCC 10792	71.6%		Bacillus bombysepticus Wang	74.1%
	VEPT00000000.1	GCF_006349585.1	B. cereus ssp.A (cereus) A31	Bacillus cereus ATCC 14579	89.8%	98.87	Bacillus bombysepticus (cereus) FORC087	73.6%	96.98	s__Bacillus_A cereus	GCA_000007825.1	ATCC 14579	310 genomes
				Bacillus thuringiensis ATCC 10792	70.2%		Bacillus bombysepticus Wang	73.6%
	VEPS00000000.2	GCF_006349695.2	B. cereus ssp.B (bombysepticus) TK1	Bacillus bombysepticus (cereus) FORC087	88.3%	98.41	Bacillus cereus ATCC 14579	73.3%	96.92	s__Bacillus_A bombysepticus	GCA_006384875.1	FORC087	667 genomes
				Bacillus bombysepticus Wang	85.8%		Bacillus cereus ATCC 10876	80.2%
	CP085498.1	GCF_006349715.2	B. cereus ssp.B (bombysepticus) A22	Bacillus bombyepticus (cereus) FORC087	92.8%	98.99	Bacillus cereus ATCC 14579	74.3%	97.00	s__Bacillus_A bombysepticus	GCA_006384875.1	FORC087	667 genomes
				Bacillus bombysepticus Wang	87.8%		Bacillus cereus ATCC 10876	82.3%
	JABSVF000000000.1	GCF_013284445.1	B. cereus ssp.B (bombysepticus) M2.1B	Bacillus bombyepticus (cereus) FORC087	89.1%	98.51	Bacillus cereus ATCC 14579	72.9%	96.91	s__Bacillus_A bombysepticus	GCA_006384875.1	FORC087	667 genomes
				Bacillus bombysepticus Wang	85.5%		Bacillus cereus ATCC 10876	80.0%
	VEPQ00000000.1	GCF_006349775.1	B. cereus ssp.B (bombysepticus) A42	Bacillus bombysepticus (cereus) FORC087	86.2%	98.29	Bacillus cereus ATCC 14579	74.1%	97.12	s__Bacillus_A bombysepticus	GCA_006384875.1	FORC087	667 genomes
				Bacillus bombysepticus Wang	91.8%		Bacillus cereus ATCC 10876	83.5%
	VEPR00000000.1	GCF_006370265.1	B. cereus ssp.B (bombysepticus) SN4-3	Bacillus bombysepticus (cereus) FORC087	86.7%	98.29	Bacillus cereus ATCC 14579	73.4%	97.12	s__Bacillus_A bombysepticus	GCA_006384875.1	FORC087	667 genomes
				Bacillus bombysepticus Wang	94.1%		Bacillus cereus ATCC 10876	83.4%
	VEPV00000000.1	GCF_006349625.1	B. tropicus ssp.B SN1	Bacillus tropicus N24	72.5%	96.99	B. paranthracis Mn5	65.8%	96.05	s__Bacillus_A tropicus	GCA_001884035.1	N24	123 genomes
				B. cereus MOD1_Bc66	87.2%		B. cereus G9241	77.7%
	VEPW00000000.1	GCF_006349645.1	B. tropicus ssp.B CD3-2	Bacillus tropicus N24	72.4%	96.93	B. paranthracis Mn5	65.3%	95.82	s__Bacillus_A tropicus	GCA_001884035.1	N24	123 genomes
				B. cereus MOD1_Bc66	87.2%		B. cereus G9241	77.1%
	VEPU00000000.1	GCF_006349595.1	B. pacificus ssp.B SN4.1	B. pacificus EB422	77.2%	97.40	B. paranthracis Mn5	64.1%	95.69	s__Bacillus_A paranthracis	GCA_001883995.1	Mn5	297 genomes
				B. cereus MOD1_Bc210	74.2%		Bacillus cereus ATCC 14579	65.6%
	JABSVD000000000.1	GCF_013284485.1	Bacillus sp. HD1.3	B. pacificus EB422	66.3%	95.88	Bacillus tropicus N24	63.4%	95.59	s__Bacillus_A tropicus	GCA_001884035.1	N24	123 genomes
				B. cereus MOD1_Bc210	66.2%		B. thuringiensis serovar finitimus YBT-020	62.2%
	VEPX00000000.1	GCF_006349665.1	Bacillus sp. CD3-5	B. thuringiensis serovar finitimus YBT-020	88.7%	98.68	B. cereus MOD1_Bc210	66.3%		s__Bacillus_A paranthracis	GCA_001883995.1	Mn5	297 genomes
				B. paranthracis Mn5	69.6%	96.53	B. thuringiensis HD571	60.6%
	VEPY00000000.1	GCF_006349675.1	Bacillus sp. CD3-1a	Bacillus anthracis ATCC 14578	84.4%	98.27	B. paranthracis Mn5	62.5%	95.53	s__Bacillus_A anthracis	GCA_000742895.1	Vollum	505 genomes
				Bacillus anthracis Vollum	84.4%	98.27	B. thuringiensis HD571	78.0%
	Genome sequences used for comparison
	CP029454.1	GCA_006384875.1	Bacillus bombysepticus (cereus) FORC087
BGC03	AP007209.1	GCA_000007825.1	Bacillus cereus ATCC 14579	ATCC 14579			Frankland GC, Frankland PF. Studies on some new microorganisms obtained from air. Royal Society London, Philosophical Transactions, Series B, Biological Sciences 1887; 178:257-287
	MACG00000000.1	GCA_001884035.1	Bacillus tropicus N24	KCTC 33711			Liu Y, Du J, Lai Q, Zeng R, Ye D, Xu J, Shao Z. Proposal of nine novel species of the Bacillus cereus group. Int J Syst Evol Microbiol 2017; 67:2499-2508.								doi: 10.1099/ijsem.0.001821
	MACE00000000	GCF_001883995.1	B. paranthracis Mn5	KCTC 33714			Liu Y, Du J, Lai Q, Zeng R, Ye D, Xu J, Shao Z. Proposal of nine novel species of the Bacillus cereus group. Int J Syst Evol Microbiol 2017; 67:2499-2508.								doi: 10.1099/ijsem.0.001821
	MACD00000000	GCF_001884025.1	Bacillus pacificus MCCC 1A06182	EB422; KCTC 33858; MCCC 1A06182			Liu Y, Du J, Lai Q, Zeng R, Ye D, Xu J, Shao Z. Proposal of nine novel species of the Bacillus cereus group. Int J Syst Evol Microbiol 2017; 67:2499-2508.								doi: 10.1099/ijsem.0.001821
	ADFM00000000.1	GCA_000177295.1	B. cereus SJ1
	CP009600.1	GCF_000832825.1	B. thuringiensis HD571
	CP001407.1	GCF_000022505.1	B. cereus 03BB102
BGC20	CP002508.1	GCA_000190515.1	B. thuringiensis serovar finitimus YBT-020
	NHVE00000000.1	GCA_002199315.1	B. cereus MOD1_Bc210
	MIFN00000000.1	GCA_001913385.1	B. cereus MOD1_Bc66
	AAEK00000000.1	GCA_000167215.1	B. cereus G9241
	ACWE00000000.1	GCF_000238655.1	Bacillus sp. 7_6 55CFAA_CT2
	NIQX00000000.1	GCF_002200015.1	Bacillus cereus MOD1 Bc203
	CP014282.1	GCF_001595725.1	Bacillus thuringirnsis Bt 185
BGC03	AHFH00000000.1	GCF_000290775.1	Bacillus cereus VD156
BCG16	PGDV00000000.1	GCF_002911825.1	Bacillus thuringiensis seovar sotto T04001
	CM000715.1	GCF_000160895.1	Bacillus cereus ATCC 10876
BCG01	CP076225.1	GCF_022221345.1	Bacillus anthracis Vollum, chromosome
	CP076226.1		Bacillus anthracis Vollum, pXO1	cyaA pagA lef repX
	CP076227.1		Bacillus anthracis Vollum, pXO2	capA capB capC capD capE repS
	CP007512.1	GCF_000831065.1	Bacillus bombysepticus Wang	NCBI:txid1330043			Cheng T, Lin P, Jin S, Wu Y, Fu B, Long R, Liu D, Guo Y, Peng L, Xia Q. 2014. Complete genome sequence of Bacillus bombysepticus, a pathogen leading to Bombyx mori black chest septicemia. Genome Announc. 2(3):e00312-14. doi:10.1128/genomeA.00312-14.
BCG04	CM000753.1	GCF_000161615.1	Bacillus thuringiensis Berliner	ATCC 10792

## Sheet: Table S3
Suppl. Table S3: List of the 17 B. cereus group strains used in this study with detailed annotations. Identity values of virulence factor genes (VFDB) confirmed by annotation performed with PATRIC are underlined. Bacillus anthracis Vollum, Bacillus bombysepticus, and Bacillus thuringiensis type strains were was added for comparison. Both the genome size and G+C content are based on the complete s…
accession	species/subsp./strain	Status	cry	cesA	hblC	hblD	hblA	hblB	nheC	nheA	nheB	cytK	pOX1(-like)	cyaA	pagA	lef	repX query cover	identity	pXO2 (-like)	capA	capB	capC	capD	capE	repS query cover	identity	CDS BV-BRC	hypothetical proteins	Proteins with functional assignments	Proteins with EC number assignments	Proteins with GO assignments	Proteins with Pathway assignments	Proteins with Subsystem assignments	Proteins with PATRIC (Plfam) assignments
CP076225.1	Bacillus anthracis Vollum, chromosome	chromosome	´-´	´-´	27.7%	0.4	0.24	´-´	0.94	0.98	0.99	0.39	´-´	´-´	´-´	´-´	´-´	´-´							´-´	´-´
CP076226.1	Bacillus anthracis Vollum, pXO1	plasmid	´-´	´-´	´-´	´-´	´-´	´-´	´-´	´-´	´-´	´-´	pXO1	0.99	0.99	1	1	1							´-´	´-´	232	156	76	13	12	6	7	232
CP076227.1	Bacillus anthracis Vollum, pXO2	plasmid	´-´	´-´	´-´	´-´	´-´	´-´	´-´	´-´	´-´	´-´		´-´	´-´	´-´	´-´	´-´	pXO2	1	1	1	1	1	1	1	123	70	53	8	7	5	3	123
CM000753.1	Bacillus thuringiensis Berliner ATCC 10792	´genome	´+´	´-´	0.96	0.99	0.99	0.98	0.99	0.99	0.99	1	´-´	´-´	0.33	´-´	´-´	´-´		0.34	´-´	´-´	´-´	´-´	0.79	0.27	6427	1920	4507	1122	1081	841	1347	6423
	6163766-616723		Cry1Aa1
	5759937-5763620		Cry1Ba1
CP007512.1	Bacillus bombysepticus str. Wang	chromosome	´-´	´-´	0.94	0.99	1	0.99	0.99	0.99	0.99	1	´-´	´-´	0.44	´-´	´-´	´-´		0.34	´-´	´-´	´-´	0.54	´-´	´-´	5848	1548	4300	1111	1170	841	1348	5848
CP007513.1	Bacillus bombysepticus str. Wang, pBP	plasmid	´-´	´-´	0.76	0.86	0.7	0.64	´-´	´-´	´-´	´-´	´-´	´-´	´-´	´-´	´-´	´-´									558	371	187	47	37	33	9	558
CP085501.1	B. cereus ssp.A (cereus) A24	chromosome	´-´	´-´	0.96	0.99	0.98	0.98	0.99	0.99	1	0.99	´-´	´-´	´-´	´-´	´-´	´-´		0.34	´-´	´-´	´-´	0.54	´-´	´-´	6073	1531	4542	1138	960	837	1425	5803
CP085502.1	B. cereus ssp.A (cereus) A24, p1	plasmid	´-´	´-´	´-´	´-´	´-´	´-´	´-´	´-´	´-´	´-´	´-´	´-´	´-´	´-´	´-´	´-´		´-´	´-´	´-´	´-´	´-´	´-´	´-´
CP085503.1	B. cereus ssp.A (cereus) A24, p2	plasmid	´-´	´-´	´-´	´-´	´-´	´-´	´-´	´-´	´-´	´-´	´-´	´-´	´-´	´-´	´-´	´-´		´-´	´-´	´-´	´-´	´-´	´-´	´-´
CP085510.1	B. cereus ssp.A (cereus) HD1.4B	chromosome	´-´	´-´	0.96	0.99	0.99	0.98	1	0.99	0.99	1	´-´	´-´	´-´	´-´	´-´	´-´		34.4%	´-´	´-´	´-´	0.54	´-´	´-´	5899	1449	4450	0	941	0	0	5649
CP085511.1	B. cereus ssp.A (cereus) HD1.4B, p1	plasmid	´-´	´-´	0.26	0.4	´-´	´-´	0.52	0.41	0.44	´-´	´-´	´-´	0.26	´-´	´-´	´-´		´-´	´-´	´-´	´-´	´-´	´-´	´-´
CP085512.1	B. cereus ssp.A (cereus) HD1.4B, p2	plasmid	´-´	´-´	´-´	´-´	´-´	´-´	´-´	´-´	´-´	´-´	´-´	´-´	´-´	´-´	´-´	´-´		´-´	´-´	´-´	´-´	´-´	´-´	´-´
CP085513.1	B. cereus ssp.A (cereus) HD1.4B, p3	plasmid	´-´	´-´	´-´	´-´	´-´	´-´	´-´	´-´	´-´	´-´	´-´	´-´	´-´	´-´	´-´	´-´		´-´	´-´	´-´	´-´	´-´	´-´	´-´
CP085506.1	B. cereus ssp.A (cereus) HD2.4	chromosome	´-´	´-´	0.96	0.99	0.99	0.98	1	0.99	0.99	1	´-´	´-´	´-´	´-´	´-´	´-´		34.4%	´-´	´-´	´-´	0.54	´-´	´-´	5887	1441	4446	0	941	0	0	5643
CP085507.1	B. cereus ssp.A (cereus) HD2.4, p1	plasmid	´-´	´-´	0.26	0.4	´-´	´-´	0.52	0.41	0.44	´-´	´-´	´-´	25.3%	´-´	´-´	´-´		´-´	´-´	´-´	´-´	´-´	´-´	´-´
CP085508.1	B. cereus ssp.A (cereus) HD2.4, p2	plasmid	´-´	´-´	´-´	´-´	´-´	´-´	´-´	´-´	´-´	´-´	´-´	´-´	´-´	´-´	´-´	´-´		´-´	´-´	´-´	´-´	´-´	´-´	´-´
CP085509.1	B. cereus ssp.A (cereus) HD2.4, p3	plasmid	´-´	´-´	´-´	´-´	´-´	´-´	´-´	´-´	´-´	´-´	´-´	´-´	´-´	´-´	´-´	´-´		´-´	´-´	´-´	´-´	´-´	´-´	´-´
JABSVB010000001-JABSVB010000082	B. cereus ssp.A (cereus) HB3.1	WGS	´-´	´-´	0.96	1	0.99	1	1	0.99	1	0.99	´-´	´-´	´-´	´-´	´-´	´-´		0.34	´-´	´-´	´-´	0.54	´-´	´-´	6063	1501	4562	0	976	0	0	5788
VDDR01000001-VDDR01000052	B. cereus ssp.A (cereus) A8	WGS	´-´	´-´	0.97	0.99	1	0.98	0.99	0.99	0.99	1	´-´	´-´	´-´	´-´	´-´	´-´		0.34	´-´	´-´	´-´	0.54	´-´	´-´	6082	1506	4576	1164	978	862	1422	5881
VEPT01000001-VEPT01000102	B. cereus ssp.A (cereus) A31	WGS	´-´	´-´	0.97	1	1	0.98	0.99	0.99	0.99	0.99	´-´	´-´	´-´	´-´	´-´	´-´		0.34	´-´	´-´	´-´	0.54	´-´	´-´	5697	1342	4355	1104	931	816	1367	5514
VEPS02000001-VEPS02000363	B. cereus ssp.B (bombysepticus) TK1	WGS	´+´	´-´	0.94	0.99	1	0.98	0.99	0.99	0.99	1	´-´	´-´	´-´	´-´	´-´	´-´		0.34	´-´	´-´	´-´	0.54	´-´	´-´	7545	2126	5419	1362	1141	993	1650	6986
	VEPS02000075.1 7617-9515	WGS	cry2Ba1(14)
	VEPS02000075.1 235-2391	WGS	cry1A1(9)
	VEPS02000083.1 5275-7173	WGS	cry2Ba1(14)
	VEPS02000083.1 9911-12280	WGS	Vip3A
CP085498.1	B. cereus ssp.B (bombysepticus) A22	chromosome	´-´	´-´	0.94	0.99	1	0.98	0.99	0.99	0.99	1	´-´	´-´	´-´	´-´	´-´	´-´		0.34	´-´	´-´	´-´	0.54	´-´	´-´	6240	1627	4613	1143	959	845	1431	5955
CP085499.1	B. cereus ssp.B (bombysepticus) A22, p1	plasmid	´-´	´-´	´-´	´-´	´-´	´-´	´-´	´-´	´-´		´-´	´-´	´-´	´-´	´-´	´-´		´-´	´-´	´-´	´-´	´-´	´-´	´-´
CP085500.1	B. cereus ssp.B (bombysepticus) A22, p2	plasmid	´-´	´-´	´-´	´-´	´-´	´-´	´-´	´-´	´-´		´-´	´-´	´-´	´-´	´-´	´-´		´-´	´-´	´-´	´-´	´-´	´-´	´-´
JABSVF010000001-JABSVF010000063	B. cereus ssp.B (bombysepticus) M2.1B	WGS	´-´	´-´	0.94	0.99	0.99	0.98	0.99	0.99	0.99	1	´-´	´-´	´-´	´-´	´-´	´-´		0.34	´-´	´-´	´-´	0.54	´-´	´-´	6232	1669	4563	0	943	0	0	5895
VEPQ01000001-VEPQ01000042	B. cereus ssp.B (bombysepticus) A42	WGS	´-´	´-´	0.94	0.99	1	0.98	0.99	0.99	0.99	1	´-´	´-´	25.3%	´-´	´-´	´-´		33.3%	´-´	´-´	´-´	0.54	´-´	´-´	5871	1443	4428	1146	963	842	1409	5656
VEPR01000001-VEPR01000078	B. cereus ssp.B (bombysepticus) SN4-3	WGS	´-´	´-´	0.94	0.99	1	0.99	0.99	0.99	0.99	1	´-´	´-´	0.26	´-´	´-´	´-´		0.34	´-´	´-´	´-´	53.6%	´-´	´-´	5946	1471	4475	1138	954	836	1401	5706
VEPV01000001-VEPV01000034	B. tropicus ssp.B SN1	WGS	´-´	´-´	0.94	0.97	0.99	0.98	0.94	0.97	0.99	0.98	´-´	´-´	´-´	´-´	´-´	´-´		0.34	28.0%	´-´	´-´	´-´	´-´	´-´	5696	1329	4367	1127	946	831	1391	5552
VEPW01000001-VEPW01000068	B. tropicus ssp.B CD3-2	WGS	´-´	´-´	0.96	0.99	0.99	0.98	0.95	0.97	0.99	0.98		´-´	´-´	´-´	´-´	´-´		0.34	28.0%	´-´	´-´	´-´			6361	1739	4622	1182	998	870	1436	6069
	VEPW01000034.1 9097-10503	WGS																	pXO2-like						0.93	0.46
VEPU01000001-VEPU01000032	B. pacificus ssp.B SN4-1	WGS	´-´	´-´	0.29	0.41	´-´	´-´	0.94	0.97	0.99	0.96	pXO1-like	´-´	´-´	´-´				33.5%	28.0%	´-´	´-´	0.57	´-´	´-´	5786	1371	4415	1133	957	849	1349	5557
	VEPU01000007.1 40814-42118																1	0.98
JABSVD010000001-JABSVD010000056	Bacillus sp. HD1.3	WGS	´-´	´-´	0.97	0.99	0.99	0.98	0.98	0.97	1	0.98	´-´	´-´	0.26	´-´	´-´	´-´		33.6%	27.2%	´-´	´-´	0.57	´-´	´-´	5947	1445	4502	0	967	0	0	5715
VEPX01000001-VEPX01000050	Bacillus sp. CD3-5	WGS	´-´	´-´	0.95	0.99	0.99	0.98	0.96	0.97	0.99	0.41	´-´	´-´	´-´	´-´	´-´	´-´		33.6%	´-´	´-´	´-´	53.6%	´-´	´-´	5517	1258	4259	1120	943	829	1327	5347
VEPY01000001-VEPY01000040	Bacillus sp. CD3-1a	WGS	´-´	´-´	0.96	0.99	0.99	0.96	0.94	0.97	0.99	0.97	´-´	´-´	´-´	´-´	´-´	´-´		33.2%	´-´	´-´	´-´	53.6%	´-´	´-´	5579	1314	4265	1090	918	810	1379	5390

## Sheet: Table S4
Table S4: Genome annotation of the four completely sequenced B. cereus strains by RASTk. Features shown in Suppl. Fig. S5 are indicated by red letters.
				RASTtk
strain	gb accession	WGS	SRA accession	size (bp)	G+C	coding sequences	proteins	Rep/Par	features	assignment TYGS
A22	CP085498.1	chromosome	SRR12104976	5,310,791	35.2%	5640	5.304		KEGG human disease: 132, lepA	B. cereus ssp. B
	CP085499.1	plasmid1		480.744	32.8%	502			IS200, phospholipase C, SASP, integrase, IS200, RNAP ECF, FosB, IS150, phage, RpoD, TraG/D, gluconate operon, collagenase, repO, dnaC, SAV0808, IS1630, IS66, pXO1-73, anthrose biosynthesis, IS 150, myo inositol catabolic operon, IS66, BGC thumolycin, pXO1-73, UvrX
	CP085500.1	plasmid2		93.775	32.9%	108			Rep, type 1 RM, integrase, Xre, IS200, signal peptidase
A24	CP085501.1	chromosome	SRR12104975	5,268,018	35.7	5.897	5.235		KEGG human disease: 128, lepA	B. cereus ssp. A
	CP085502.1	plasmid1		471.669	32.7%	513			BGC thumolycin, siderophore export, myo inositol catabolic operon, anthrose biosynthesis, typeI RM SMR, phage, dnaC repO, gluconate operon, traG/D, SASP, RpoD, IS200, RNAP ECF, integrase recombinase, ranthipeptide,Xre, colicin Dnase, tyrosine recombinase, phospholipase C, hemolysin, pXO1-73
	CP085503.1	plasmid2		12.241	29.0%	18		UDW03916.1	phage, recombinase, ftsK, integrase, IS200, rep, Xre
HD1.4 B	CP085510.1	chromosome	SRR12132980	5,183,870	34.9	5.737	5.168		KEGG human disease: 122, lepA	B. cereus ssp. A
	CP085511.1	plasmid1		503.267	32.6%	536		UDV85383.1	pX01-73, NHE/HBL enterotoxin, SASP, collagenase, phospholipase C, colicin DH, int, SASP, integrase, bacteriocin II, pulcherriminic acid synthase, muramidase, protease, phage, IS200, RpoD, traG/traD, cerein precursor, type III RM, BGC thumolycin, DNAC/DnaI, repO
	CP085512.1	plasmid2		42.073	34.6%	63		UDV85418.1	ParA, Ftsk, sigma, RNAP, Xre, phage, lysin, holin
	CP085513.1	plasmid3		11.143	28.5%	14		UDV85463.1	Rep, phage, integrase
HD2.4	CP085506.1	chromosome	SRR12124346	5,183,312	34.9	5.734	5.166		KEGG human disease: 122, lepA	B. cereus ssp. A
	CP085507.1	plasmid1		503.267	32.6%	531			mobile element, murein hydrolase, succinoglycan biosynthesis, cyclo(L-leucyl-L-leucyl) synthase, Xre, pulcherriminic acid synthase, integrase, collagenase, SASP, enterotoxin, tyrosine recombinase, phospholipase C, pXO1-73, colicin Dnase, IS200, BGC thumolycin type III RM, phage, repO, SASP, lantibiotic cerein B, myo inositol catabolic operon, traG/D, RpoD, signal peptidase
	CP085508.1	plasmid2		42.073	34.6%	63			ParA, phage, DNA primase, RNAP, Ftsk, lysin, xre,
	CP085509.1	plasmid3		11.143	28.5%	13		UDV91011.1	Rep, phage, integrase

## Sheet: Table S5
Suppl. Table S5: BGCs present in the genomes of Vietnamese B. cereus s.l. isolates
	type	nr	name, characterization	similarity to		protein	occurrence
NRPS/PKS
BGC1	NRPS-like saccharide	11	X-Val	BGC0001532	34.0%	ATY37592.1	chromosome B. cereus A22	CP085498	394,232-418,701
BGC4	NRP-metallophore, NRPS	17	bacillibactin (Gly Thr)	BGC0001185	62.0%	ABS75232.1	chromosome B. cereus A22	CP085498	2,203,925-2,218,131
BGC5	NRPS	13	kurstakin (krs), Thr-Gly-Ala-Ser-His-Gln-Gln	krsA	1	AIG26884.1	chromosome B. cereus A22	CP085498	2,323,856-2,352,099
BGC9	NRPS	8	X Cys	BGC0001469	42.0%	RAT94090.1	chromosome B. cereus A22	CP085498	2,640,978-2,647,994
BGC14	arylpolyene, NRPS	4	thumolycin, Orn-X-Ile-X-Leu	thoH	1	AFJ14794.1	plasmid P1 B. cereus A22	CP085499	434,523-464,,832
BGC22	NRPS, PKS	4	Zwittermicin	BGC0001059	1	AAR87759.1	B. cereus SN4.3	VEPR01000006	41,742-97,940
BGC34	NRPS-like, transAT-PKS	1	locillomycin mal Thr-Gln-Asn-Asp(2)-Gly(2)-Tyr-Val	BGC0001005	0.86	AHI59109.1	B. cereus A8	VDDR01000035	1-5,258
BGC36	NRPS	1	Ser-X-X-Gln	BGC0002061	0.36	WP_012408783.1	Bacillus sp. CD3.5	VEPX01000012	75,953-110,920
BGC37	PKS NRPS	1	mal Ser Leu, necrose inducing protein (NPP1)	BGC0001536	0.37	ATY37609.1	B. tropicus CD3.2	VEPW01000022	21,309-41,127
BGC38	NRPS-like,transAT-PKS	1	unknown polyketide	BGC0001728	0.46	WP_013310341.1	B. pacificus HD1.3	JABSVD010000006	336,008-354,070
Lanthipeptides (Lantibiotics)
BGC19	RiPP, lanthipeptide classii (A2) LanM	4	LchA2/BrtA2 family, plantaricin C/cerecidin	BGC0002663	0.35	plan_WP_001233918	B.cereus A42	VEPQ01000012	1 - 21,987
BGC20	RiPP, lanthipeptide classii (A2) LanT LanM	3	Thuricin /Macedovicin 59.1	BGC0000626	0.82	thuA WP_044585332	B. cereus TK1, SN4.3	VEPR01000006	30,701 - 39.719
BGC21	RiPP, lanthipeptide classiic (A2) LanT LanM	2	plantaricin C/lichenicidin	BGC0002663	0.37	lanA_WP_033692916	B. tropicus CD3.2, SN1	VEPW01000034	25,049 - 38,025
BGC23	RiPP, lanthipeptide classii (A2) LanM	1	geobacillin/salivaricinA 109.1	BGC000516	0.36	salA_WP_270697137.1	Bacillus sp. CD3.1a	VEPY01000005	363,566 - 373,024
BGC25	RiPP, lanthipeptide classi (A1) LanB LanC	1	paenibacillin A/subtilomycin 297.1	BGC0000560	0.37	paenA_WP_001031160	B. cereus SN4.3	VEPR01000027	30,343 - 42,142
Linear azol(in)e-containing peptides (LAPs)
BGC2	RiPP,LAP, sagB, sagC, TOMM	16	thiomuracin/thiocillin	BGC0001860	0.39	no core peptide detected	chromosome B. cereus A22	CP085498	1,211,713- 1,219,071
BGC35	RiPP, LAP sagB/ThcOx, TOMM	1	Trifolitoxin/RRE_LAP (PF00881)	BGC0000567	0.37	no core peptide detected	Bacillus sp. CD3.5	VEPX01000008	171,139 - 183,593
Glyocin
BGC17	RiPP. sublancin family CER074,GlyS, SunS	2	glyocin, comC, sublancin 127.1 (pfam 19151)	BGC0001863	0.81	WP_002130747.1	plasmid P2 B. cereus A24, HD2.4	CP085503.1	1,775 -12,241
BGC18	Terpene+RiPP, glyocin	1	bacillicin CER074	BGC0001863	0.83	WP_000489764.1	B. tropicus CD3.2, SN1	VEPW01000034	26,448 - 32,014
BGC33	RiPP like, glyocin, GlyS, LanT	1	HlyD family, Cerein_7B 52.2	BGC0002674	0.36	BAR87971.1	B. cereus HB3.1	JABSVB010000029	4,376 - 14,011
Lassopeptides
BGC29	RiPP, lassopeptide, PaeB1 PaeB2 PaeC (LasC)	11	paeninodin 334.1	BGC0001356	0.57	EHQ60560.1	Bacillus CD3.1A	VEPY01000001	1,170 - 1,179,671
BGC30	RRE containing lassopeptide LasB1 LasB2	1	EQQ22160, hypothetical protein KQ105737		0.97	EOQ22160.1	B. pacificus HD1.3	JABSVD010000006	221,203 -231,703
Ranthipeptides
BGC15	Lasso_RRE, ranthipeptide, Radical SAM	4	lassopeptide biosynthesis	BGC0002583	0.61	AAN59159.1	plasmid P1 B. cereus A24	CP085502.1	163,175 - 165,943
Sactipeptides
BGC26	RiPP, sactipeptide, Radical SAM, BmbF LanT	4	thurincin H (17) 136.1	BGC0000600	0.7	WP_217695470.1	B. pacificus SN4.1	VEPU01000006	123,918 - 131,325
BGC28	RiPP, sactipeptide, RRE-containing, YfjT, BmbF	10	radical SAM YfkAB,	BGC0000600	0.4	WP_ 0005135581	B. cereus A42	VEPQ010000081.7.	47,649 - 58,977
Thiopeptides
BGC7/8	RiPP-like bacteriocin	17	heterocycloanthracin/sonorensin family	unknown		UDW08772.1	chromosome B. cereus A22	CP085498	2,482,358 - 2,603,257
Class II bacteriocins
BGC13	Blp family class II bacteriocin	2	Lantibiotic Cerein_7B 52.2			WP_017657761.1	P1 B. cereus HD1.4B,HD2.4	CP085511	280,828 - 286,162
BGC12	holin like peptide	5	BhlA/UviB 224.2			WP_098328186.1	Plasmid P1 B. cereus HD2.4	CP085507.1	330,431 - 325,134
BGC16	holin like peptide	6	BhlA/UviB 223.2			WP_000392444.1	chromosome B. cereus A24	CP085501.1	1,068,611 - 1,080,087
Other
BGC3	NI siderophore, other	14	petrobactin	BGC0000942	0.84	AAP25874.1	chromosome B. cereus A22	CP085498	1,865738 - 1,872,820
BGC6	betalactone	17	fengycin (only flanking sequences)	BGC0001095	79.0	ABS74196.1	chromosome B. cereus A22	CP085498	2,408,779 - 2,416,779
BGC10	terpene, other	17	squalene hopene cyclase	BGC0000663	0.17	CAB39697.1	chromosome B. cereus A22	CP085498	3,457,748 -3,453,991
BGC11	CDPS, other	4	pulcherriminic acid, cyclo L-leucyl_dipeptide	BGC0002103	0.61	UDV85383.1	plasmid P1 B. cereus HD1.4B	CP085511	122,668 -127,271
BGC24	saccharide, ladderane	2	S-layer glycan	BGC0000794	0.68	AAR99612.1	B. cereus A8, HB3.1	JABSVB010000018	45,793 - 68,072
BGC31	nucleoside, other	1	LipM	BGC0001020	0.14	ADZ45330.1	B. cereus HB3.1	JABSVB010000023	1227 - 15173
BGC32	furan, other	1	methylenomycin	BGC0000914	0.35	CAC36757.1	B. cereus SN4.3	VEPR01000027	49,341 - 64,823

## Sheet: Table S6
Suppl. Table S6: Gene clusters (BGCs) of the Vietnamese Bacillus cereus group isolates involved in nonribosomal synthesis ofsecondary metabolites.
	CP085498 - Region 1 - Uncharacterized NRPS-like X saccharide (BGC1)
	identifier	Product	Location	length		gene	MIBiG hits		similarity				binding pocket		remarks
				NT	AA		protein	cluster	% ID	% coverage	BLAST score	coordinates	residues	prediction
BGC1	FHP23_002065	Crp/Fnr family transcriptional regulator	394,232 - 394,921	690	229				1	1	470				WP_001081905.1 Crp/Fnr family transcriptional regulator [Bacillus]
	FHP23_002070	ABC transporter permease	395,078 - 395,761	684	227
	FHP23_002075	BBE domain-containing protein	395,886 - 396,422	537	178
	FHP23_002080	alpha-glucosidase	396,577 - 398,241	1665	554		EHN79427.1	BGC0000804	33.0	94.4	260.0				Saccharide
	FHP23_002085	PTS transporter subunit IIBC	398,442 - 400,079	1638	545		AFV25491.1	BGC0000469	29.0	81.3	156.0				RiPP:Bottromycin
	FHP23_002090	endonuclease/exonuclease/phosphatase family protein	400,084 - 400,875	792	263
	FHP23_002095	YhgE/Pip domain-containing protein	401,181 - 404,126	2946	981				1	1	981				WP_000810092.1 YhgE/Pip domain-containing protein [Bacillus]
	FHP23_002100	DNA topoisomerase III	404,167 - 406,356	2190	729	topB	MBX4265657.	BGC0002667	33.0	89.0	243.0
	FHP23_002105	hydroxyethylthiazole kinase	406,765 - 407,574,	810	269	thiM			1	1	535				EEK52609.1 Hydroxyethylthiazole kinase [Bacillus cereus ATCC 10876]
	FHP23_002110	thiamine phosphate synthase	407,590 - 408,249	660	219	thiE
	FHP23_002115	anaerobic C4-dicarboxylate transporter	408,364 - 409,677	1314	437
	FHP23_002120	methyl-accepting chemotaxis protein	410,179 - 411,921	1743	580		WP_011104615.1	BGC0002571	27.0	44.1	98.0
	FHP23_002125	amino acid adenylation domain-containing protein	412,058 - 415,639	3582	1193		ATY37592.1	BGC0001532	34.0	89.4	572.0	355 - 572	D A W A A G V V	Esyn1-M2-Val	M1 X (A CP NAD)
	FHP23_002130	MTH1187 family thiamine-binding protein	415,895 - 416,215	321	106
	FHP23_002135	ABC transporter permease	416,187 - 416,960	774	257		AXM42913.1	BGC0001940	32.0	82.1	99.0
	FHP23_002140	ABC transporter substrate-binding protein	416,957 - 417,955	999	332
	FHP23_002145	ABC transporter ATP-binding protein	417,952 - 418,701	750	249		CUX79067.1	BGC0001715	40.0	91.2	178.0
BGC4	The bacillibactin gene cluster (BGC4) resides on the chromosome of B. cereus A22 (=(BGC0001185)																The bacillibactin gene cluster FZB42
	FHP23_011345	2,3-dihydro-2,3-dihydroxybenzoate dehydrogenase	2,203,925 - 2,204,710	786	261	dhbA	ABS75236.1	BGC0001185	65.0	97.3	322.0						RBAM_RS14715	2,3-dihydro-2,3-dihydroxybenzoate dehydrogenase	3,032,205 - 3,032,990	786	261	dhbA	ABS75236.1	BGC0001185	100.0	98.1	488.0
	FHP23_011350	isochorismate synthase DhbC	2,204,736 - 2,205,935	1200	399	dhbC	ABS75235.1	BGC0001185	57.0	100.0	442.0						RBAM_RS14710	isochorismate synthase DhbC	3,030,985 - 3,032,181	1197	398	dhbC	ABS75235.1	BGC0001185	100.0	100.0	786.0
	FHP23_011355	(2,3-dihydroxybenzoyl)adenylate synthase	2,205,948 - 2,207,564	1617	538	dhbE	ABS75234.1	BGC0001185	72.0	99.1	800.0						RBAM_RS14705	(2,3-dihydroxybenzoyl)adenylate synthase	3,029,341 - 3,030,966	1626	541	dhbE	ABS75234.1	BGC0001185	100.0	100.0	1090.0
	FHP23_011360	isochorismatase family protein	2,207,589 - 2,208,482	894	297	dhbB	ABS75233.1	BGC0001185	60.0	101.7	365.0						RBAM_RS14700	isochorismatase	3,028,397 - 3,029,323	927	308	dhbB	ABS75233.1	BGC0001185	100.0	100.0	619.0
	FHP23_011365	non-ribosomal peptide synthetase	2,208,516 - 2,215,673	7158	2385	dhbF	ABS75232.1	BGC0001185	62.0	99.7	2996.0	609 814	D I L Q V G L I	NosC-M2-Gly			RBAM_RS14695	non-ribosomal peptide synthetase	3,021,255 - 3,028,382	7128	2375	dhbF	ABS75232.1	BGC0001185	100.0	100.0	4711.0	600 805	D I L Q V G L I	NosC-M2-Gly
												1669 1887	D F W N V G M V	SyrE-M7-Thr														1661 1879	D F W N I G M V	CchH-M2-Thr
	FHP23_011370	MbtH family protein/stimulator_of_DhbF_tyrosine_adenylation_activity	2,215,670 - 2,215,894	225	74		CAX52685.1	BGC0000309	60.0	81.1	93.0						RBAM_RS14690	MbtH family NRPS accessory protein	3,021,021 - 3,021,236	216	71		WP_020635020.1	BGC0001211	62.0	93.0	95.0
	FHP23_011375	multidrug efflux MFS transporter	2,215,894 - 2,217,324	1431	476		CBA63674.1	BGC0000368	46.0	87.2	380.0						RBAM_RS14685	YukJ family protein	3,020,299 - 3,020,976	678	225		WP_012118325.1
	FHP23_011380	4'-phosphopantetheinyl transferase Sfp	2,217,382 - 2,218,131	750	249	sfp	ABX71091.1	BGC0000238	34.0	94.0	128.0						RBAM_RS14680	alanine dehydrogenase	3,019,050 - 3,020,180	1131	376	ald	WP_003152011.1
																	RBAM_RS14675	PucR family transcriptional regulator	3,017,717 - 3,018,946	1230	409		WP_012118324.1
BGC5	The kurstakin gene cluster resides on the chromosome of B. cereus A22 (=BGC5)
	FHP23_011965	MFS transporter	2,323,856 - 2,325,109	1254	417	krsE	AZF85943.1	BGC0001963	23.0	57.3	51.0
	FHP23_011970	non ribosomal peptide synthetase	2,325,123 - 2,329,679	4557	1518	krsA	AIG26884.1	BGC0002432	39.0	100.9	1019.0	598 815	D F W N I G M V	CchH-M2-Thr (1)
	FHP23_011975	non-ribosomal peptide synthetase	2,329,682 - 2,336,152	6471	2156	krsB	MCF2151708.1	BGC0002625	45.0	98.7	1778.0	606 821	D V W Q F G F I	TycC-M2-Gln (Gly2)
												1668 1870	D L F N N A L -	McyA-M2-Gly (Ala3)
	FHP23_011980	non-ribosomal peptide synthase/polyketide synthase	2,336,149 - 2,351,031	14883	4960	krsC	AEU11003.1	BGC0001029	43.0	101.5	3851.0	635 852	D V W H F S L V	Cda1-M1-Ser (4)
												1692 1896	D S Q S I G Q V	NO HIT (His5)
												2739 2951	D A Q D - G V V	NO HIT (Gln6)
												4254 4466	D V Q D L G V V	MycB-M3-Gln (7)
	FHP23_011985	4'-phosphopantetheinyl transferase superfamily protein	2,351,473 - 2,352,099	627	208	sfp	BAH43769.1	BGC0000452	47.0	95.2	189.0
	CP085498 - Region 9 - NRPS X Cys (BGC9)
	FHP23_013485	response regulator transcription factor	2,630,924 - 2,631,589	666	221	bacR	AAD21216.2	BGC0000310	38.0	103.6	162.0
	FHP23_013490	HAMP domain-containing histidine kinase	2,631,582 - 2,633,054	1473	25
	FHP23_013495	DinB family protein	2,633,102 - 2,633,371	270	89
	FHP23_013500	hypothetical protein	2,633,573 - 2,633,755	183	60
	FHP23_013505	ABC transporter ATP-binding protein	2,634,048 - 2,634,725	678	225		CAA60452.1	BGC0001040	58.0	97.3	252.0
	FHP23_013510	ABC transporter permease	2,634,737 - 2,636,167	1431	476		CAA60453.1	BGC0001040	34.0	102.1	229.0
	FHP23_013515	alpha/beta hydrolase family protein	2,636,739 - 2,637,740	1002	333
	FHP23_013520	alpha/beta hydrolase	2,638,400 - 2,639,356	957	318
	FHP23_013525	aminotransferase class I/II-fold pyridoxal phosphate-dependent enzyme	2,639,468 - 2,640,922	1455	484		KGO40471.1	BGC0001205	38.0	92.6	296.0
	FHP23_013530	amino acid adenylation domain-containing protein	2,640,978 - 2,647,994	7017	2338		RAT94090.1	BGC0001469	42.0	79.3	1419.0	405 609	D I L E L A I I	NO HIT
												1429 1639	D L Y N L S L I	MtaD-M1-Cys
	FHP23_013535	SagB/ThcOx family dehydrogenase	2,648,027 - 2,649,004	978	325		RAT94092.1	BGC0001469	41.0	97.8	268.0
	FHP23_013540	type I pullulanase	2,649,876 - 2,652,434	2559	852	pulB	ABP55498.1	BGC0001006	32.0	69.6	244.0				alpha-1,6-glucosidase,_pullulanase-type
	FHP23_013545	M4 family metallopeptidase	2,652,920 - 2,654,623	1704	567
BGC14	The thumolycin gene cluster resides on plasmid 1 of B. cereus A22 (=BGC14)																The thumolycin gene cluster in B. thuringiensis BMB171 plasmid (NC_014172)
	FHP23_029480	aldehyde dehydrogenase family protein	434,523 - 435,704	1182	393	thoA	ACA34359.1	BGC0001152	35.0	93.4	234.0						BMB171_RS28245	aldehyde dehydrogenase family protein	168,927 - 170,108	1182	393		ACA34359.1	BGC0001152	35.0	93.4	235.0
	FHP23_029485	thiamine pyrophosphate-binding protein	435,724 - 437,376	1653	550	thoB	ACA34360.1	BGC0001152	31.0	100.9	266.0						BMB171_RS28250	thiamine pyrophosphate-binding protein	170,128 - 171,780	1653	550		ACA34360.1	BGC0001152	31.0	100.9	270.0
	FHP23_029490	long-chain fatty acid -CoA ligase	437,380 - 438,747	1368	455	thoC	ABS74201.1	BGC0001095	29.0	75.6	135.0						BMB171_RS28255	class I adenylate-forming enzyme family protein	171,784 - 173,151	1368	455		ABS74201.1	BGC0001095	29.0	75.6	131.0
	FHP23_029495	3-oxoacyl-(acyl-carrier-protein) synthase	438,744 - 439,448	705	234	thoD	WP_139848462.1		1	1	489						BMB171_RS28260	hypothetical protein	173,148 - 173,852	705	234		WP_000787316.1
	FHP23_029500	ketoacyl-ACP synthase	439,472 - 440,626	1155	384	thoE	BAF92595.1	BGC0000118	35.0	101.6	184.0						BMB171_RS28265	beta-ketoacyl synthase N-terminal-like domain-containing protein	73,876 - 175,030	1155	384		BAF92595.1	BGC0000118	35.0	101.6	184.0
	FHP23_029505	cyclic peptide export ABC transporter	440,837 - 442,888	2052	683	thoG	ACM79808.1	BGC0001059	45.0	95.5	533.0						BMB171_RS28270	cyclic peptide export ABC transporter	175,354 - 177,291	1938	645		ACM79808.1	BGC0001059	45.0	100.8	536.0
	FHP23_029510	non ribosomal peptide synthetase	442,903 - 450,525	7623	2540	thoH	AFJ14794.1	BGC0000403	38.0	101.3	1660.0	597 813	D V G E V G T I	NO HIT (Orn1)			BMB171_RS28275	non-ribosomal peptide synthetase	177,306 - 184,928	7623	2540		AFJ14794.1	BGC0000403	38.0	101.3	1662.0
												1641 1846	D V E Q I G H V	GrsB-M1-Pro
	FHP23_029515	non ribosomal peptide synthetase	450,571 - 461,025	10455	3484	thoI	KYQ85937.1	BGC0002437	40.0	89.9	2250.0	613 822	D G F F L G V V	LchAC-M1-Leu (Ile3)			BMB171_RS28280	non-ribosomal peptide synthetase	184,972 - 195,426	10455	3484		KYQ85937.1	BGC0002437	40.0	89.9	2249.0
												1641 1846	D V E Q I G H V	GrsB-M1-Pro
												2663 2859	D A W F L G N V	McyB-M1-Leu (5)
	FHP23_029520	ABC-F type ribosomal protection protein	461,093 - 462,943	1851	616	thoJ	KON98595.1	BGC0002122	30.0	86.2	233.0						BMB171_RS28285	ABC-F type ribosomal protection protein	195,494 - 197,344	1851	616	abc-f	KON98595.1	BGC0002122	30.0	86.2	231.0
	FHP23_029525	thioesterase II family protei	463,229 - 463,957	729	242	thoK	ATY37597.1	BGC0001532	41.0	97.1	202.0						BMB171_RS28290	thioesterase domain-containing protein	197,630 - 198,358	729	242		ATY37597.1	BGC0001532	40.0	97.1	201.0
	FHP23_029530	4'-phosphopantetheinyl transferase superfamily protein	464,125 - 464,832	708	235	thoL	BAH43769.1	BGC0000452	50.0	91.1	218.0						BMB171_RS28295	4'-phosphopantetheinyl transferase superfamily protein	198,526 - 199,233	708	235		BAH43769.1	BGC0000452	50.0	91.1	218.0
BGC22	The zwittermicin gene cluster in B. cereus SN4-3 (VEPR01000006) BGC22 (=BGC0001059)
	FHR08_11730	2,3-diaminopropionate biosynthesis protein SbnB	41,742 - 42,710	969	322	zmaV	ACM79821.1	BGC0001059	98.0	100.0	632.0
	FHR08_11735	2,3-diaminopropionate biosynthesis protein SbnA	42,738 - 43,715	978	325	zmaU	ACM79820.1	BGC0001059	98.0	100.0	637.0
	FHR08_11740	ornithine carbamoyltransferase	43,836 - 44,768	933	310	zmaT	ACM79819.1	BGC0001059	98.0	100.0	599.0
	FHR08_11745	4'-phosphopantetheinyl transferase superfamily protein	45,555 - 46,253	699	232	zmaS	ACM79813.1	BGC0001059	94.0	100.0	442.0
	FHR08_11755	non ribosomal peptide synthetase	46,502 - 53,038	6537	2178	zmaQ	ACM79812.1	BGC0001059	97.0	100.0	4215.0	418 633	D V F Y F G L V	CepB-M1-HPG
												1461 1676	D V F Y L G G V	Pps3-M2-Val
	FHR08_11760	thioesterase	53,280 - 53,999	720	239	zmaP	ACM79811.1	BGC0001059	99.0	100.0	484.0
	FHR08_11765	non ribosomal peptide synthetase	54,055 - 58,551	4497	1498	zmaO	ACM79810.1	BGC0001059	99.0	100.0	2922.0	598 807	D L T K I G E V	MycC-M2-Asx
	FHR08_11770	HAD-IIIC family phosphatase	58,533 - 59,612	1080	359	zmaN	ACM79809.1	BGC0001059	99.0	100.0	716.0
	FHR08_11775	cyclic peptide export ABC transporter	59,609 - 62,692	3084	1027	zmaM	ACM79808.1	BGC0001059	99.0	99.9	1988.0
	FHR08_11780	LLM class flavin-dependent oxidoreductase	62,708 - 63,784	1077	358	zmaL	AAR87761.2	BGC0001059	99.0	100.0	696.0
	FHR08_11785	non ribosomal peptide synthetase/T1PKS	63,803 - 71,491	7689	2562	zmaK	AAR87760.2	BGC0001059	99.0	100.0	5049.0	583 796	D M W N T G M V	SyrE-M7-Thr
	FHR08_11790	amino acid adenylation domain-containing protein	71,466 - 73,043	1578	525	zmaJ	AAR87759.1	BGC0001059	100.0	100.0	1041.0	146 364	D V W H F S X X	PhsB-M1-Ser
	FHR08_11795	acyl-CoA dehydrogenase	73,040 - 74,233	1194	397	zmaI	AAR87758.1	BGC0001059	99.0	100.0	797.0
	FHR08_11800	acyl carrier protein	74,233 - 74,478	246	81	zmaH	AAR87757.1	BGC0001059	100.0	100.0	162.0
	FHR08_11805	3-hydroxyacyl-CoA dehydrogenase family protein	74,509 - 75,357	849	282	zmaG	AAR87756.1	BGC0001059	100.0	100.0	568.0
	FHR08_11810	ACP S-malonyltransferase	75,398 - 76,615	1218	405	zmaF	AAD40110.1	BGC0001059	99.0	100.0	787.0
	FHR08_11815	GNAT family N-acetyltransferase	76,635 - 77,762	1128	375	zmaR	AAD40108.1	BGC0001059	99.0	100.0	766.0
	FHR08_11820	acyl-CoA dehydrogenase	77,759 - 78,907	1149	382	zmaE	AAD40109.1	BGC0001059	98.0	100.0	736.0
	FHR08_11825	acyl carrier protein	78,904 - 79,167	264	87	zmaD	AAD40107.1	BGC0001059	99.0	100.0	171.0
	FHR08_11830	non ribosomal peptide synthetase	79,200 - 81,854	2655	884	zmaC	ACM79807.1	BGC0001059	97.0	100.0	1729.0
	FHR08_11835	non ribosomal peptide synthetase	82,174 - 87,897	5724	1907	zmaB	ACM79806.1	BGC0001059	99.0	100.0	3744.0	413 630	D A Q D I A A V	NO HIT
												1466 1679	D V L N L A M V	NO HIT
	FHR08_11840	SDR family NAD(P)-dependent oxidoreductase	87,924 - 97,940	10017	3338	zmaA	ACM79805.1	BGC0001059	99.0	100.0	6579.0
BGC34	VDDR01000033 - Region 1 -B.cereus A8 NRPS (BGC34, NRP+polyketide) = BGC0001005 locillomycin
	TNB91107.1	amino acid adenylation domain-containing protein	1 - 3,165	3165	1054	locA	AHI59108.1	BGC0001005	83.0	99.9	1724.0 Thr1	151 364	D F W N I G M V	CchH-M2-Thr	locillomycin_synthase_A M1:Thr
	TNB91108.1	amino acid adenylation domain-containing protein	3,312 - 8,572	5261	1754	locB	AHI59109.1	BGC0001005	76.0	100.1	2715.0 Gln2	411 614	D V E Q I G C V	NO HIT Gln)	locillomycin_synthase_B M2:D-X
	VDDR01000035 - Region 1 - NRPS
	TNB91083.1	amino acid adenylation domain-containing protein	1 - 5,258	5258	1753	locB	AHI59109.1	BGC0001005	46.0	101.3	1600.0 Asp3(2x)	413 619	D L T K I G E V	MycC-M2-Asx	locillomycin synthase_B M3:D-Asn
	TNB91084.1	non-ribosomal peptide synthetase	5,344 - 7,302	1959	652		AHI59109.1	BGC0001005	77.0	99.8	998.0 Gly4( 2x)
	VDDR01000032 - Region 1 - B.cereus A8 NRPS (BGC34, NRP+polyketide) = BGC0001005 locillomycin
	TNB91120.1	non-ribosomal peptide synthetase	3 - 1,961	1959	652	locB	AHI59109.1	BGC0001005	86.0	99.8	1112.0 Asn5	409 617	D G L X T V R V	NO HIT	locillomycin B
	TNB91121.1	non-ribosomal peptide synthetase	2,055 - 9,136	7082	2360	locC	AHI59110.1	BGC0001005	80.0	79.7	3036.0 Asp6	1442 1649	D A F W I G G T	TycC-M4-Val	locillomycin C M1:Tyr M4:Val
	VDDR01000038 - Region 1 - NRPS
	TNB90921.1	amino acid adenylation domain-containing protein	1 - 3,164	3164	1055	locC	AHI59110.1	BGC0001005	54.0	100.1	1146.0 Gly7	144 357	D V W H F S L I	PhsB-M1-Ser	locillomycin_synthase C M5:Ser
	VDDR01000010 - Region 1 - NRPS-like
	TNB96306.1	amino acid adenylation domain-containing protein	1 - 2,505	2505	834	locC	AHI59110.1	BGC0001005	56.0	100.1	929.0 Tyr8	152 360	D G V X T V G V	NO HIT	locillomycin CM6:X
	FHG65_18950	response regulator transcription factor	2,731 - 3,414	684	227	graR	AHI59111.1	BGC0001005	90.0	100.0	419.0 Val9				response_regulator_protein_GraR
	FHG65_18955	HAMP domain-containing histidine kinase	3,411 - 4,433	1023	340		AHI59112.1	BGC0001005	85.0	99.7	572.0				two-component_sensor_histidine_kinase
	TNB96309.1	thioesterase	4,458 - 5,195	738	245	bogJ	ATY37597.1	BGC0001532	41.0	92.7	197.0
	FHG65_18965	4'-phosphopantetheinyl transferase superfamily protein	5,254 - 5,955	702	233		AAU39365.1	BGC0000381	41.0	95.3	166.0
	FHG65_18970	ABC transporter ATP-binding protein	6,241 - 7,005	765	254		AHI59113.1	BGC0001005	92.0	100.0	456.0
	FHG65_18975	ABC transporter permease	6,992 - 8,917	1926	641		AHI59114.1	BGC0001005	83.0	100.0	1005.0
	FHG65_18980	efflux RND transporter permease subunit	9,023 - 12,049	3027	1008		AHI59115.1	BGC0001005	83.0	100.2	1542.0
	FHG65_18985	recombinase family protein	13,056 - 14,603	1548	515
	VEPX01000012 - Region 1 - NRPS (BGC36)
	FH036_20655	4'-phosphopantetheinyl transferase superfamily protein	75,953 - 76,879	927	308		AGJ76607.1	BGC0000869	33.0	69.5	110.0
	FH036_20660	transporter	76,852 - 78,114	1263	420		QOP59284.1	BGC0002504	42.0	92.6	294.0
	FH036_20665	monooxygenase	78,174 - 79,724	1551	516
	FH036_20670	beta-ketoacyl-ACP synthase II	80,108 - 81,343	1236	411	fabF	ACC80690.1	BGC0002711	47.0	99.5	382.0
	FH036_20675	non-ribosomal peptide synthetase	81,367 - 89,523	8157	2718		WP_012408783.1	BGC0002061	36.0	103.4	1672.0	164 375	D V W H I S L I	NosA-M2-Ser	M1:Ser WP_103557183.1
												1220 1434	D D V Q V S S I	NO HIT	M2:X
												2268 2474	D V R H F A F L	NO HIT	M3:X
	FH036_20680	amino acid adenylation domain-containing protein	89,523 - 93,479	3957	1318		CZT62794.1	BGC0001614	36.0	100.1	806.0	611 822	D A T Q F G L V	NO HIT	M4: Gln TNP23667.1
	FH036_20685	argininosuccinate lyase	93,485 - 94,984	1500	499		KMO93430.1	BGC0002095	43.0	93.6	394.0
	FH036_20690	kinase	94,984 - 95,919	936	311		ARU08064.1	BGC0001448	46.0	91.0	264.0				NRP:Lipopeptide:Ca+-dependent lipopeptide
	FH036_20695	cysteine synthase family protein	95,916 - 96,971	1056	351		ARU08088.1	BGC0001448	52.0	94.3	352.0				NRP:Lipopeptide:Ca+-dependent lipopeptide
	FH036_20700	ATP-grasp domain-containing protein	96,949 - 98,202	1254	417		ADY76670.1	BGC0000950	41.0	97.4	316.0
	FH036_20705	low-specificity L-threonine aldolase	98,186 - 99,247	1062	353		ADN26256.1	BGC0000951	60.0	99.2	432.0
	FH036_20710	helix-turn-helix transcriptional regulator	99,440 - 100,342	903	300
	FH036_20715	response regulator transcription factor	101,094 - 101,756	663	220		AAU34214.1	BGC0000388	31.0	49.1	58.0
	FH036_20720	GNAT family N-acetyltransferase	102,121 - 102,642	522	173		BCN28648.1	BGC0002441	39.0	98.0	170.0				Polyketide+NRP
	FH036_20725	SDR family oxidoreductase	102,626 - 103,378	753	250		BCN28648.1	BGC0002441	39.0	98.0	170.0				3-oxoacyl-ACP_reductase
	FH036_20730	ACP S-malonyltransferase	103,402 - 104,346	945	314
	FH036_20735	hypothetical protein	104,350 - 105,258	909	302		QBL56199.1	BGC0002376	29.0	97.0	141.0				ACP_S-malonyltransferase
	FH036_20740	acyl--CoA ligase	05,275 - 106,714	1440	479		ACA34358.1	BGC0001152	37.0	97.1	300.0				Polyketide+NRP:Lipopeptide
	FH036_20745	aldehyde dehydrogenase family protein	106,702 - 107,940	1239	412		ACA34359.1	BGC0001152	46.0	98.1	380.0				Polyketide+NRP:Lipopeptide
	FH036_20750	thiamine pyrophosphate-binding protein	107,928 - 109,610	1683	560		ACA34360.1	BGC0001152	43.0	101.8	437.0				acetolactate_synthase_large_subunit
	FH036_20755	ketoacyl-ACP synthase III	109,617 - 110,663	1047	348		AEE65482.1	BGC0000223	49.0	93.7	327.0				Type II polyketide
	FH036_20760	acyl carrier protein	110,660 - 110,920	261	86
	VEPW01000022 - Region 1 - NRPS,NRPS-like,transAT-PKS-like (BGC37)
	FHY73_25305	thioesterase	21,309 - 22,016	708	235		AAD21211.1	BGC0000310	37.0	99.6	165.0				NRP
	FHY73_25310	4'-phosphopantetheinyl transferase superfamily protein	22,013 - 22,696	684	227		BAH43769.1	BGC0000452	36.0	89.4	132.0				NRP
	FHY73_25315	ATP-binding cassette domain-containing protein	23,103 - 24,119	1017	338		BAV57055.1	BGC0001514	39.0	94.7	243.0				Other
	FHY73_25320	ABC transporter permease	24,122 - 24,919	798	265
	FHY73_25325	hypothetical protein	24,928 - 25,725	798	265
	FHY73_25330	transAT PKS-like	25,742 - 28,216	2475	824		AZH23793.1	BGC0001970	49.0	61.4	474.0				NRP+Polyketide M1:mal
	FHY73_25335	amino acid adenylation domain-containing protein	28,252 - 31,602	3351	1116		ATY37609.1	BGC0001536	37.0	94.9	722.0	648 865	D V W H V G L I	PvdD-M3-Ser	NRP, M2:Ser
	FHY73_25340	hypothetical protein	31,838 - 32,605	768	255
	FHY73_25345	amino acid adenylation domain-containing protein	32,621 - 35,068	2448	815		MCF2150416.1	BGC0002625	36.0	84.0	437.0	369 578	D A F X F G A V	CssA-M8-Leu	NRP+Polyketide M3:Leu
	FHY73_25350	hypothetical protein	35,078 - 36,097	1020	339
	FHY73_25355	homoserine dehydrogenase	36,117 - 37,382	1266	421		QXJ26480.1	BGC0002370	35.0	76.5	177.0
	FHY73_25375	mosquitocidal toxin protein, necrosis_inducing_factor	39,577 - 41,127	1551	516		ABA59542.1	BGC0000453	55.0	45.2	264.0				WP_139889351.1 NPP1 family protein [Bacillus tropicus]
	JABSVD010000006 - Region 2 - NRPS-like,transAT-PKS (BGC38)
	NRR17661.1	4'-phosphopantetheinyl transferase superfamily protein	336,008 - 336,721	714	237		BAH43769.1	BGC0000452	43.0	97.9	187.0				NRP
	NRR17662.1	MMPL family transporter	337,318 - 339,612	2295	764		WP_053065264.	BGC0001330	30.0	97.3	265.0				NRP:Cyclic depsipeptide+Polyketide:Modular type I polyketide
	NRR17663.1	thioesterase	339,728 - 340,453	726	241		ABS75105.1	BGC0002641	33.0	95.0	162.0				NRP
	NRR17664.1	non-ribosomal peptide synthetase	340,546 - 343,179	2634	877		WP_013310341.1	BGC0001728	46.0	77.0	623.0				aminotransferase_class_III-fold_pyridoxal_phosphate-dependent_enzyme
	NRR17665.1	ACP S-malonyltransferase	343,181 - 344,488	1308	435	fabD	WP_013310340.1	BGC0001728	40.0	95.2	293.0				NRP+Polyketide
	NRR17666.1	HAD-IIIC family phosphatase	344,507 - 351,523	7017	2338		WP_013310341.1	BGC0001728	43.0	33.1	615.0				aminotransferase_class_III-fold_pyridoxal_phosphate-dependent_enzyme
	NRR17667.1	ketopantoate reductase family protein	351,683 - 352,651	969	322
	NRR17668.1	hypothetical protein	352,748 - 354,070	1323	440										biosynthetic-additional (rule-based-clusters) Condensation

## Sheet: Table S7
Suppl. Table S7: Gene clusters (BGCs) of the Vietnamese Bacillus cereus group isolates involved in ribosomal synthesis of antimicrobial peptides (RiPPs and bacteriocins).
	identifier	Product	Location	length		gene	MIBiG hits		similarity			Remark
				NT	AA		protein	cluster	% ID	% coverage	BLAST score
BGC2	A22 CP085498	BGC2 (LAP protocluster, YcaO, Thiopeptide_F_RRE)	Linear azol(in)e-containing peptides
LAP	identifier	Product	Location	length		gene	MIBiG hits		similarity			Remark
				NT	AA		protein	cluster	% ID	% coverage	BLAST score
	FHP23_006280	CoA-disulfide reductase	1,211,713 - 1,213,047	1335	444		CAH55628.1	BGC0000258	42.0	33.1	123.0
	FHP23_006285	DUF3908 family protein	1,213,208 - 1,213,618	411	136
	FHP23_006290	SagB family peptide dehydrogenase, FMN dependent	1,213,649 - 1,215,190	1542	513	sagB	AAP11950.1	BGC0000612	29.0	100.6	223.0	RiPP:Thiopeptide
	FHP23_006295	SagC cyclodehydratase	1,215,206 - 1,217,155	1950	649	sagC	ADG87282.1	BGC0001860	39.0	103.4	425.0	cyclodehydratase
	FHP23_006300	putative thiazole-containing bacteriocin maturation protein	1,217,152 - 1,219,071	1920	639	sagD						docking protein
BGC7/BGC8	A22 CP085498	6
thiopeptide	FHP23_012625	heterocycloanthracin/sonorensin family bacteriocin	2,482,358 - 2,482,579	222	73							RiPP-like: TIGR03601, CDD:274673
heterocycloanthracin	FHP23_013285	heterocycloanthracin/sonorensin family bacteriocin	2,600,229 - 2,600,477	249	82			UDW08772.1				RiPP-like: TIGR03601, CDD:274673
	FHP23_013290	beta-lactamase family protein	2,600,578 - 2,601,594	1017	338
	FHP23_013295	hypothetical protein	2,601,626 - 2,601,769	144	47
	FHP23_013300	OFA family MFS transporter	2,602,049 - 2,603,257	1209	402		ANH11396.1	BGC0001770	24.0	85.8	82.0	Major facilitator superfamily MFS 1
BGC12	CP0855071.0.AOI_01 HD2.4 plasmid1 UviB 224.2 (BGC12)
UviB Holin BhlA	orf00013	Putative transposase InsK for IS150	330431-331240
224.2	orf00014	Insertion element IS1223 uncharacterized 20.7 kDa protein	329883-330404
	orf00016	Uncharacterized protein YegX, GH25 family lysozyme	328959-329807		282		WP_017657719.1	19595298	1	1	583	GH25 family lysozyme [Bacillus cereus]
	orf00017	224.2;UviB core peptide, BhlA holin family; pfam10960	328792-328959		55		WP_098328186.1	22231453	95.83%	0.87	89.4	BhlA/UviB family holin-like peptide [Bacillus cereus]
	orf00020	Uncharacterized protein Lmo0128	328103-328675
	orf00022		327483-327986
	orf00024		326473-327405
	orf00025		325551-326462
	orf00026		325161-325538
	orf00028	A type blood alpha-D-galactosamine galactosaminidase	318844-325134		2096		WP_227754019.1		100.00%	100.00%	4302	hypothetical protein [Bacillus cereus] Carbohydrate esterase
BGC13	CP085511	BGC13
bacteriocin	HQJ03_027860	Blp family class II bacteriocin	280,828 - 281,052	225	74		WP_017657761.1		100.0	100.0	135	Blp family class II bacteriocin [Bacillus cereus]
class ii	HQJ03_027865	hypothetical protein	281,199 - 281,393	195	64		WP_048538531.1		100.0	100.0	121	hypothetical protein [Bacillus cereus]
	HQJ03_027870	double glycinepeptidase domain-containing ABC transporter	281,626 - 283,845	2220	739	cbnT	AAB81307.1	BGC0002579	44.0	96.2	587.0	WP_048538532.1 ABC-type bacteriocin/lantibiotic exporter containing an N-terminal double glycine peptidase domain
	HQJ03_027875	HlyD family secretion protein	283,838 - 285,142	1305	434	hlyD	WP_048538533.1		1	1	857	HlyD family efflux transporter periplasmic adaptor subunit [Bacillus cereus]
	HQJ03_027880	autotransporter	285,186 - 285,869	684	227	tpA	WP_048538534.1		1	1
	HQJ03_027885	hypothetical protein	285,890 - 286,162	273	90
BGC15	CP085502.1	A24 plasmid1: BGC15 (RiPP, ranthipeptide)
Ranthipeptide	FHQ13_027640	radical SAM protein	164,828 - 165,943	1116	371	skfB	AAN59159.1	BGC0002583	61.0	98.9	474.0	WP_069604343.1 radical SAM protein [Bacillus cereus group]
SCIFF	FHQ13_027635	hypothetical protein	164,521 - 164,835	315	104		WP_080480408.1		100.0	100.0	205	hypothetical protein [Bacillus cereus group]
	FHQ13_027630	MATE family efflux transporter	163,175 - 164,524	1350	449		SQF39789.1	BGC0001929	32.0	95.5	151.0	multi_antimicrobial_extrusion_(MATE)_family_transporter
BGC16	CP085501.1A24chromosome UviB 223.2 (BC16)
Holin UviB	orf00004	Phosphite transport system permease protein PtxC	1079284-1080087			ptxC
223.2	orf00005	Phosphonate transport system permease	1078490-1079284			phnE
	orf00006	Phosphonates import ATP-binding protein PhnC	1077747-1078493			phnC
	orf00009	Phosphate-import protein PhnD	1076650-1077636			phnD
	orf00011	Trifunctional nucleotide phosphoesterase protein YfkN	1074929-1076512			yfkN
	orf00012	UPF0291 protein B. cereus DSM31	1074650-1074889
	orf00013	Resolvase homolog YneB	1073948-1074604			yneB
	orf00014	LexA repressor B. cereus DSM31	1073186-1073833
	orf00016		1072292-1073095
	orf00018		1071749-1072291
	orf00019	Putative DNA-binding protein YizB	1071433-1071756			yziB
	orf00022	223.2;UviB, BhlA holin family; pfam10960	1070831-1071061		76		WP_000392444.1		100.00%	100.00%	151	BhlA/UviB family holin-like peptide [Bacillus]
	orf00023	N-acetylmuramoyl-L-alanine amidase CwlA	1069873-1070769		298	cwlA	WP_139849087.1		100.00%	100.00%	620	N-acetylmuramoyl-L-alanine amidase [Bacillus cereus]
	orf00027	Pneumococcal vaccine antigen A	1068611-1069600		329		MRD39147.1		99.70%	1	676	lysozyme family protein
BGC17	CP085503.1	A24 plasmid2 BGC17 (RiPP:glyocin)= BGC0001863 sublancin bacillicin CER074 75%
Glyocin	FHQ13_029185	thioredoxin family protein	1,775 - 2,179	405	134		WP_002130750.	BGC0001863	80.0	99.3	213.0
Bacillicin CER074	FHQ13_029190	SunS family peptide S-glycosyltransferase	2,198 - 3,469	1272	423		WP_002130752.1	BGC0001863	65.0	100.0	567.0
	FHQ13_029195	disulfide bond formation protein B	3,488 - 3,901	414	137		WP_002130754.1	BGC0001863	76.0	100.0	211.0
AntiSMASH	FHQ13_029200	MarR family transcriptional regulator	4,128 - 4,712	585	194		WP_002130755.1	BGC0001863	94.0	100.0	352.0	Terpene+RiPP:Glycocin
	FHQ13_029205	site-specific integrase	5,659 - 6,687	1029	342
	FHQ13_029210	AAA family ATPase	7,027 - 7,590	564	187
	FHQ13_029215	MerR family transcriptional regulator	8,065 - 8,625	561	186		QTH19317.1	BGC0002442	90.0	96.2	301.0
	FHQ13_029220	helix-turn-helix domain-containing protein	9,061 - 9,726	666	221		WP_002130757.1	BGC0001863	95.0	100.0	405.0
	FHQ13_029225	tyrosine-type recombinase/integrase	10,048 - 10,620	573	190		WP_002130744.1	BGC0001863	98.0	98.9	369.0
	FHQ13_029230	PH domain-containing protein	11,023 - 11,412	390	129		WP_002130745.1	BGC0001863	62.0	95.3	143.0
	FHQ13_029235	hypothetical protein CER074	11,651 - 11,839	189	62		WP_002130747.1	BGC0001863	79.0	100.0	108.0	WP_061530458.1(81%)
	FHQ13_029180_UPPER	peptidase domain-containing ABC transporter	11,917 - 12,241	325	108		WP_002130748.1	BGC0001863	76.0	100.0	171.0
127.1 sublancin	orf00001	Spbeta phage disulfide bond formation protein A	1,775 - 2,179			bdbA
BAGEL4	glyS	SPbeta prophage-derived glycosyltransferase SunS	2,198 - 3,469			sunS
	orf00003	Spbeta phage disulfide bond formation protein C	3,488-3901			bdbB
	orf00005	Uncharacterized 23.6 kDa protein	4,113-4,712
	orf00006		4,842-5,036
	orf00007		5,095-5,238
	orf00012	Tyrosine recombinase XerA	5,659-6687
	orf00014		7,027-7,590
	orf00015		7,690-7,968
	orf00017		8,083-8,625
	orf00021	HTH-type transcriptional activator BcrR	9,061 - 9,726
	orf00023	Probable integrase/recombinase YoeC	10,048-10,620
	orf00027		11,023-11,412
	orf00029	ComC; 127.1; sublancin_168	11651-11839	PF03047;		sunA	competence stimulating peptide precursors
							the leader sequence is cleaved after two conserved glycine residues; thus the leader sequence is of the double- glycine type
BGC18	VEPW01000034
Mersacidin-like	orf00003		26,448-26,642
BAGEL4	orf00004	class II lanthipeptide, LchA2/BrtA2 family	27,309-27542	CDD:439476			WP_000489764.1			Most members have three Cys residues in conserved positions among their last 15 amino acids. Named members include lichenicidin A2 (LchA2) and the birimositide beta chain, BrtA2.
	orf00005		27,737-27,934				WP_061402410.1
	orf00008 LanT	Lantibiotic mersacidin transporter system	27.979-30,135	PF00005;PF03412		lanT
	orf00011 ABC	Lantibiotic immunity protein	30,518-31,225	PF12730
	orf00012 ABC	Putative lantibiotic ABC transporter, peremase protein	31,271-32,014	PF12730
BGC19	VEPQ01000012 - Region 1 -A42, RiPP, lanthipeptide-class-ii (BGC19)
Lanthipeptide	FHR06_25215	IS6 family transposase (IS1519L)	1 - 488	488	88		CAC33837.1	BGC0000523	46.0	93.2	85.0	RiPP:Lanthipeptide
A2	FHR06_25220	peptidase S8	627 - 1,985	1359	452		ACY56714.1	BGC0000600	42.0	99.3	369.0	ThnP
plantaricin	FHR06_25225	AraC family transcriptional regulator	2,595 - 3,041	447	148		EFI65088.1	BGC0001407	45.0	95.9	140.0
	FHR06_25230	hypothetical protein	3,559 - 3,888	330	109
	FHR06_25235	peptidase domain-containing ABC transporter	4,053 - 6,218	2166	721		BAB04170.1	BGC0000517	52.0	99.9	754.0	lantibiotic_haloduracin_protease_and_transporter
	FHR06_25240	type 2 lantipeptide synthetase LanM	6,233 - 9,382	3150	1049	lanM	AMQ71642.1	BGC0002663	34.0	100.0	590.0
	FHR06_25245	class II lanthipeptide, LchA2/BrtA2 family	9,463 - 9,672	210	69		3189.6 Da protein (bridges: 4)		100	100	143	HDR8367014.1
	FHR06_25250	class II lanthipeptide, LchA2/BrtA2 family	9,687 - 9,884	198	65		3654.1 Da protein (bridges:3)		100	100	137	WP_000817350.1
	FHR06_25255	plantaricin C family lantibiotic	10,059 - 10,319	261	86		4669.3 Da protein (bridges: 3)		100	100	177	WP_001233918
	FHR06_25260	type 2 lantipeptide synthetase LanM	10,477 - 13,605	3129	1042	lanM	AMQ71639.1	BGC0002663	35.0	100.7	591.0
	FHR06_25265	hypothetical protein	15,207 - 15,437	231	76				100	100	157	EJQ02176.1 strain BAG3O-2
	FHR06_25270	phosphotransferase	15,768 - 16,667	900	299				100	100	623	EJQ02175.1 strain BAG30-2
	FHR06_25275	hypothetical protein	16,897 - 17,082	186	61		3258.7 Da protein (bridges:3)		100	100	128	PEW36891.1 strain CN436_28120
	FHR06_25280	ABC transporter permease	17,253 - 19,205	1953	650		AHI59114.1	BGC0001005	23.0	96.5	128.0
	FHR06_25285	ABC transporter ATP-binding protein	19,180 - 19,950	771	256		AHI59113.1	BGC0001005	49.0	98.0	243.0
	FHR06_25290	class A beta-lactamase	20,772 - 21,722	951	316	bla	EDY47102.1	BGC0000319	48.0	78.8	255.0
	allorf_021868_021987		21,868 - 21,987	120	39		784.9 Da protein (bridges:1)		96.55%	0.74	62.0	ANE89421.1
BGC20	VEPR01000006 - Region 1 - SN4.3 ,RiPP lanthipeptide-class-ii (BGC20) = BGC0000626: thuricin biosynthetic gene cluster from Bacillus thuringiensis
Lanthipeptide	FHR08_11715	type A2 lantipeptide, thuricin_precursor	39,719 - 39,886	168	55	thuA	AHX39582.1	BGC0000626	82.0	98.2	98.0	3671.3 Da protein (bridges:4) WP_044585332
A2	FHR08_11710	type 2 lantipeptide synthetase LanM	36,799 - 39,627	2829	942	thuM	AHX39583.1	BGC0000626	92.0	100.0	1721.0	thuricin_modification_protein
Thuricin	FHR08_11705	ATP-binding cassette domain-containing protein	34,682 - 36,784	2103	700	thuT	AHX39584.1	BGC0000626	94.0	100.0	1242.0	ABC_transporter_protein
	FHR08_11700	ABC transporter ATP-binding protein	33,704 - 34,609	906	301	thuF	AHX39585.1	BGC0000626	94.0	100.0	559.0	ABC_transporter_protein
	FHR08_11695	ABC transporter permease	32,976 - 33,701	726	241	thuE	AHX39586.1	BGC0000626	95.0	100.0	426.0
	FHR08_11690	ABC transporter permease	32,262 - 32,960	699	232	thuG	AHX39587.1	BGC0000626	96.0	100.0	417.0
	FHR08_11685	hypothetical protein	31,340 - 32,014	675	224
	allorf_030701_030868	4802.7 Da protein (bridges:1)	30,701 - 30,868	168	55
BGC21	VEPW01000034 - Region 2 - CD3.2 lanthipeptide-class-ii (BGC21)
Lanthipeptide	FHY73_29565	lichenicidin/plantaricin C family lantibiotic	37,885 - 38,025	141	46	lanA	QKV49893.1	BGC0002110	78.0	78.0	47.0	3212.5 Da protein (bridges 3)	WP_033692916.1 lichenicidin alpha family
A2	FHY73_29560	type 2 lantipeptide synthetase LanM	34,677 - 37,817	3141	1046	lanM	AMQ71639.1	BGC0002663	37.0	99.2	663.0	WP_139889502.1
	FHY73_29555	BacP protein	33,214 - 34,662	1449	482		AHJ59535.1	BGC0000502	38.0	93.2	274.0	WP_061402406.1 S8 family serine peptidase
	FHY73_29550	ABC transporter ATP-binding protein	32,011 - 32,934	924	307		AMQ70215.	BGC0002663	39.0	98.4	235.0	WP_001064855.1 ATP-binding cassette domain-containing protein
	FHY73_29545	ABC transporter permease	31,271 - 32,014	744	247				100	100		WP_061402408.1 ABC transporter permease [Terrabacteria group]
	FHY73_29540	ABC transporter permease	30,518 - 31,255	738	245		AMQ71648.1	BGC0002663	27.0	96.3	71.0	WP_068031323.1 ABC transporter permease [Terrabacteria group]
	FHY73_29535	peptidase domain-containing ABC transporter	27,979 - 30,135	2157	718		BAB04170.1	BGC0000517	50.0	99.3	735.0	WP_000473623.1 peptidase domain-containing ABC transporter [Terrabacteria group]
	FHY73_29530	hypothetical protein	27,737 - 27,934	198	65				100	100	134	WP_061402410.1 hypothetical protein [Terrabacteria group]
	FHY73_29525	hypothetical protein	27,309 - 27,524	216	71				100	100	150	WP_061402411.1
	allorf_26980_27042	3212.5 Da protein (bridges:1)	26,980 - 27,042	63	20				80	75	38.4	MCX6618132.1
	FHY73_29515	hypothetical protein	25,456 - 26,019	564	187				100	100	375	WP_061402412.1 hypothetical protein [Terrabacteria group]
	allorf_25049_25237	4666.5 Da protein (bridges:1)	25,049 - 25,237	189	62				56.25	74	53.5	WP_199710649.1 DDE-type integrase/transposase/recombinase [Bacillus cereus]
BGC23	VEPY01000005 - Region 2 - CD3.1A lanthipeptide-class-ii (BGC23) = BGC0000548: salivaricin A biosynthetic gene cluster from Streptococcus salivarius
Lanthipeptide	FH038_17885	type A2 lantipeptide SalA 2139.5 Da protein (bridges:3)	372,893 - 373,024	132	43	salA	AAA02867.2	BGC0000548	56.0	95.3	53.0	WP_060489082.1 type A2 lanthipeptide [Bacillus]
A2	FH038_17880	type 2 lantipeptide synthetase LanM	369,491 - 372,721	3231	1076	lanM	EDY04299.1	BGC0000516	36.0	97.3	658.0	WP_270697137.1 type 2 lanthipeptide synthetase LanM family protein
salivaricin	FH038_17875	peptidase domain-containing ABC transporter	367,338 - 369,494	2157	718		AMQ71643.1	BGC0002663	42.0	98.5	565.0	WP_242265667.1 peptidase domain-containing ABC transporter [unclassified Bacillus cereus group]
	FH038_17870	TlpA family protein disulfide reductase	366,817 - 367,341	525	174				99.43%	100	348	WP_071716631.1 redoxin domain-containing protein [Bacillus]
	FH038_17865	vitamin K epoxide reductase family protein	366,395 - 366,820	426	141				100	100	274	OJD57921.1 hypothetical protein BAU26_19685 [Bacillus sp. N35-10-4]
	FH038_17860	hypothetical protein	365,961 - 366,145	185	17				75.00	70	35.0	MCO3455991.1 hypothetical protein [Pseudomonas aeruginosa]
	FH038_17855	YjcZ family sporulation protein	365,765 - 365,890	126	41				100	100	72.0	PES90358.1 sporulation protein YjcZ [Bacillus cereus]
	FH038_17850	hypothetical protein	365,321 - 365,566	246	81				100	100	161	WP_000013668.1 hypothetical protein [Bacillus]
	allorf_365007_365177	predicted lanthipeptide 1574.8 Da protein (bridges:1)	365,007 - 365,177	171	56				92.73	0.98	103	OOZ90788.1 hypothetical protein BHL25_03285 [Bacillus cereus]
	FH038_17845	alpha/beta fold hydrolase	363,566 - 364,972	1407	468		CAQ52627.1	BGC0001066	27.0	85.5	129.0	WP_000889711.1 alpha/beta fold hydrolase [Bacillus]
BGC25	VEPR01000027 - Region 1 - SN4-3, lanthipeptide-class-i (BGC25) = BGC0000560: subtilomycin biosynthetic gene cluster from Bacillus subtilis
Lanthipeptide	FHR08_23535	peptidase S8	40,493 - 42,142	1650	549		KON97042.1	BGC0002122	27.0	52.3	56.0	WP_139893451.1 S8 family peptidase [Bacillus]
A1	FHR08_23530	lantibiotic paenibacillin A	39,730 - 39,885	156	51	paenA	AFS60100.1	BGC0000540	58.0	98.0	52.0	WP_001031159.1 type A lantibiotic [Bacillus]
paenibacillin	FHR08_23525	lantibiotic subtilomycinA	39,179 - 39,334	156	51	subA	AGL93171.1	BGC0000560	54.0	98.0	47.0	WP_000356689.1 type A lantibiotic [Bacillus]
	FHR08_23520	lantibiotic paenibacillin	38,652 - 38,807	156	51	paenA	AFS60100.1	BGC0000540	58.0	98.0	50	WP_001031160.1 type A lantibiotic [Bacillus]
	FHR08_23515	lantibiotic paenibacillin	38,136 - 38,291	156	51	paenA	AFS60100.1	BGC0000540	58.0	98.0	50	WP_001031160.1 type A lantibiotic [Bacillus]
	FHR08_23510	subtilisin-like_protease	37,038 - 38,012	975	324	paenP	AGL93172.1	BGC0000560	37.0	96.9	208.0	WP_097797582.1 S8 family serine peptidase [Bacillus]
	FHR08_23505	thiopeptide-type bacteriocin biosynthesis domain-containing protein	33,954 - 37,025	3072	1023	paenB	AGL93173.1	BGC0000560	36.0	101.2	652.0	WP_098300519.1 lantibiotic dehydratase [Bacillus cereus]
	FHR08_23500	lantibiotic biosynthesis protein	32,626 - 33,942	1317	438	paenC	AGL93174.1	BGC0000560	43.0	96.8	339.0	WP_119781888.1 lanthionine synthetase C family protein [Bacillus]
	FHR08_23495	hypothetical protein	32,039 - 32,590	420	139				100	100	348	WP_097797579.1 DUF5823 family protein [Bacillus]
	FHR08_23490	ABC transporter ATP-binding protein	30,343 - 32,049	1707	568	paenT	AGL93176.1	BGC0000560	46.0	101.1	496.0	WP_097797578.1 ABC transporter ATP-binding protein [Bacillus]
BGC26	VEPU01000006 - Region 3 - SN4.1, RRE-containing thurincinH (BGC26) =BGC0000600: thurincin H biosynthetic gene cluster from Bacillus thuringiensis
sactipeptide	FHY68_20960	EAL domain-containing protein	128,596 - 131,325	2730	909		CAF05631.1	BGC0001053	33.0	21.0	100.0	WP_139869109.1 bifunctional diguanylate cyclase/phosphodiesterase
thurincin H	FHY68_20955	ABC-2 transporter permease	127,504 - 128,151	648	215	thnE	ACY56715.1	BGC0000600	98.0	100.0	379.0	WP_139869108.1 ABC-2 transporter permease [Bacillus pacificus]
19732155	FHY68_20950	ABC transporter ATP-binding protein	126,642 - 127,514	873	290		CAF05631.1	BGC0001053	33.0	21.0	100.0
	FHY68_20945	GntR family transcriptional regulator	126,269 - 126,652	384	127	thnR	ACY56717.1	BGC0000600	99.0	100.0	243.0	WP_000706801.1 GntR family transcriptional regulator [Bacillus]
		thuricin17 [Bacillus cereus group]	125,812-125,901	89	30	thnA1	ACN24983.1	BGC0000600	0.96	0.87	274	WP_217695470.1
	FHY68_20940	radical SAM protein	124,848 - 125,623	776		thnB	ACY56718.1	BGC0000600	94.0	96.0	137.0	EEM22438.1 antilisterial bacteriocin (subtilosin) production [Bacillus thuringiensis serovar tochigiensis BGSC 4Y1]
	FHY68_20935	GNAT family N-acetyltransferase	124,308 - 124,814	507	168	nocD	AAT09806.1	BGC0000395	28.0	100.6	76.0	WP_139869106.1 NAT family protein [Bacillus pacificus]
	FHY68_20930	DUF4352 domain-containing protein	124,100 - 124,219	120	40				77.5	100.0	63.9	PFI49728.1 hypothetical protein COI76_22965 [Bacillus cereus]
	FHY68_20925	IS4 family transposase	123,918 - 124,091	174	57				91.23	100.6	109	PFA72215.1 4 family transposase [Bacillus cereus]
BGC28	VEPQ010000081.7.AOI_01 A42 (BGC28)
sactipeptide	orf00004	tRNA pseudouridine synthase A 2	47649-48386
small protein	orf00005	Uncharacterized cell wall amidase	48501-49394		297		WP_000758932.1		616	1	1	hypothetical protein [Bacillus]
yfjT	orf00007	Uncharacterized RNA methyltransferase	49642-51021
	orf00008	Putative DNA-3-methyladenine glycosylase YfjP	51032-51907
	orf00009	Uncharacterized 30.6 kDa protein in fumA 3'region	51955-52755		266		EEM36998.1		551	1	1	hypothetical protein bthur0003_3920 [Bacillus thuringiensis serovar thuringiensis str. T01001]
	orf00012	Putative fumarate hydratase class I	52865-54418		517	fumA	ANN30631.1		1071	99.81%	1	umarate hydratase [Bacillus thuringiensis serovar coreanensis]
	orf00014	Uncharacterized protein YfjT	54588-54770		60	yfjT	WP_000513558.1		116	1	1	SE1561 family protein [Bacillales]
	orf00017	BmbF, Putative protein YfkA	54984-56111		375	yfkA	WP_000156023.1		785	1	1	radical SAM/CxCxxxxC motif protein YfkAB [Bacillus]
	orf00019	Uncharacterized protein YfkD	56147-56881		244	yfkD	WP_002098868.1		507	1	1	YfkD famly protein [Bacillus]
	orf00021	Ca(2+)/H(+) antiporter ChaA (YfkE)	57024-58088		354	yfkE	PEW40265.1		699	1	1	calcium/proton exchanger [Bacillus cereus]
	orf00023	General stress protein 26	58259-58675		138		WP_000550220.1		286	1	1	pyridoxamine 5'-phosphate oxidase family protein [Bacillus]
	orf00024	BH0509 family protein	58831-58977		48		WP_000817786.1		94.7	1	1	BH0509 family protein [Bacillales]
BGC29	VEPY01000001 - Region 5 - CD3.1a, lassopeptide (BGC29) = BGC0001356: paeninodin biosynthetic gene cluster from Paenibacillus dendritiformis C454
Lasso	FH038_06290	sugar transferase	1,179,057 - 1,179,671	615	204		AWL83836.1	BGC0001947	57.0	97.1	222.0	WP_000825093.1 sugar transferase [Bacillus]
paeninodin	FH038_06285	acetyltransferase	1,178,428 - 1,179,060	633	210				100	100	412	WP_000697619.1 acetyltransferase [Bacillus]
	FH038_06280	pyridoxal phosphate-dependent aminotransferase	1,177,254 - 1,178,411	1158	385		CAB65209.1	BGC0000775	60.0	68.1	317.0	WP_139871598.1 DegT/DnrJ/EryC1/StrS family aminotransferase
	FH038_06275	lasso peptide isopeptide bond-forming cyclase	1,175,037 - 1,176,974	1938	645	paeC	EHQ60560.1	BGC0001356	53.0	99.8	706.0	WP_001274517.1 lasso peptide isopeptide bond-forming cyclase [Bacillus]
	FH038_06270	paeninodin family lasso peptide	1,174,897 - 1,175,022,	126	41	paeA			100.0	100.0	85.9	WP_000711188.1 paeninodin family lasso peptide [Bacillus]
	FH038_06265	aldolase,putative lassopeptide kinase, HprK-related	1,173,815 - 1,174,792	978	325	paeK	EHQ60561.1	BGC0001356	48.0	94.5	278.0	WP_001989481.1 aldolase [Bacillus]
	FH038_06260	lasso peptide biosynthesis PqqD family chaperone	1,173,559 - 1,173,864	306	101	paeB1	EHQ60562.1	BGC0001356	56.0	81.2	100.0	WP_000990395.1 lasso peptide biosynthesis PqqD family chaperone [Bacillus]
	FH038_06255	lasso peptide biosynthesis B2 protein	1,173,049 - 1,173,522	474	157	paeB2	EHQ60563.1	BGC0001356	57.0	87.9	157.0	WP_001028391.1 lasso peptide biosynthesis B2 protein [Bacillus]
	FH038_06250	nucleotidyltransferase family protein	1,171,860 - 1,173,047	1188	395	paeNT			100	100	811	WP_000409752.1 nucleotidyltransferase family protein [Bacillus]
	FH038_06245	ABC transporter ATP-binding protein	1,170,067 - 1,171,848	1782	593	paeD	EHQ60564.1	BGC0001356	53.0	100.8	583.0	WP_088125849.1 ABC transporter ATP-binding protein [Bacillus]
BGC30	JABSVD010000006 - Region 1 - HD1.3, RRE-containing,lassopeptide (BGC30)
Lasso	HQH96_19875	IS200/IS605 family transposase	221,203 - 221,604	402	133	tnpA			100	100	280	WP_033666944.1 IS200/IS605 family transposase [Bacillus]
	HQH96_19880	IS200/IS605 family element transposase accessory protein TnpB	221,610 - 222,689	1080	359	tnpB			100	100		WP_087953753.1 RNA-guided endonuclease TnpB family protein [Bacillus thuringiensis]
	HQH96_19885	hypothetical protein	222,792 - 223,169	378	125				100	100	258	NRR17555.1 hypothetical protein [Bacillus pacificus]
	HQH96_19890	nucleotide pyrophosphohydrolase	223,238 - 223,567	330	109				100	100	217	WP_173601896.1 nucleotide pyrophosphohydrolase [Bacillus pacificus]
	HQH96_19895	GNAT family N-acetyltransferase	223,689 - 224,156	468	155				100	100	308	WP_173601897.1 GNAT family N-acetyltransferase [Bacillus pacificus]
	allorf_224596_224763	biosynthetic-additional (lassopeptides) predicted lassopeptide	224,596 - 224,763	168	55	1980.3 Da protein			97.44	70	75.5	EOQ22160.1 hypothetical protein KQ1_05737 [Bacillus cereus BAG3O-1]
	allorf_224800_224919	biosynthetic-additional (lassopeptides) predicted lassopeptide	224,800 - 224,919	120	39	1980.3 Da protein			97.44	70	75.1	EOQ22160.1 hypothetical protein KQ1_05737 [Bacillus cereus BAG3O-1]
	allorf_224956_225075	biosynthetic-additional (lassopeptides) predicted lassopeptide	224,956 - 225,075	120	39	2007.3 Da protein			100	100	77.0	EOQ22160.1 hypothetical protein KQ1_05737 [Bacillus cereus BAG3O-1]
	allorf_225111_225227	biosynthetic-additional (lassopeptides) predicted lassopeptide	225,111 - 225,227	117	38	1964.3 Da protein			100	100	74.3	SCC38786.1 Uncharacterized protein BCZB5J_02925 [Bacillus cereus]
	HQH96_19900	PqqD family protein (B1)	225,326 - 225,604	279	92				100	100	181	OTY04111.1 hypothetical protein BK731_17390 [Bacillus thuringiensis serovar muju]
	HQH96_19905	lasso peptide biosynthesis B2 protein	225,597 - 226,073	477	158				100	100	326	WP_016135747.1 lasso peptide biosynthesis B2 protein [Bacillus]
	HQH96_19910	asparagine synthase	226,057 - 228,057	2001	666				100	100	1380	WP_173601899.1 asparagine synthase-related protein [Bacillus pacificus]
	HQH96_19915	ABC transporter ATP-binding protein	228,097 - 229,911	1815	604		ADM69295.1	BGC0001727	30.0	101.0	244.0	WP_173601900.1 ABC transporter ATP-binding protein [Bacillus pacificus]
	HQH96_19920	ABC transporter ATP-binding protein	229,895 - 231,703	1809	602		ALR96371.1	BGC0001289	31.0	102.0	248.0	WP_173601901.1 ABC transporter ATP-binding protein [Bacillus pacificus]
BGC33	JABSVB010000029 - Region 1 - RiPP-like(BGC33)
glyocin	HP573_28165	nucleotide pyrophosphohydrolase	4,376 - 4,705	330	109		BAJ52711.1	BGC0000222	36.0	89.9	65.0
	HP573_28175	hypothetical protein	6,166 - 6,393	228	75				1	1	151	WP_000854592.1, 75 amino acids
	HP573_28180	glycosyltransferase	6,476 - 7,870	1395	464		BAR87971.1	BGC0002674	36.0	80.4	218.0	RiPP:Glycocin
	HP573_28185	PH domain-containing protein	7,973 - 8,323	351	116
	HP573_28190	RiPP-like, peptidase domain-containing ABC transporter	8,405 - 10,624	2220	739		ACR43772.1	BGC0002577	45.0	95.8	583.0
	HP573_28195	HlyD family efflux transporter periplasmic adaptor subunit	10,617 - 11,924	1308	435				1	1	872	WP_098395406.1, HlyD family efflux transporter periplasmic adaptor subunit [Bacillus]
	HP573_28200	helix-turn-helix domain-containing protein	12,173 - 12,458	286	73
	HP573_28205	ImmA/IrrE family metallo-endopeptidase	12,759 - 13,187	429	142
	HP573_28210	helix-turn-helix transcriptional regulator	13,210 - 13,638	429	142
	HP573_28215	helix-turn-helix transcriptional regulator	13,775 - 14,011,	237	78
BGC35	VEPX01000008 - Region 1 - LAP (BGC35)
LAP	FH036_17020	DDE-type integrase/transposase/recombinase	182,975 - 183,595	621	18
	FH036_17015	helix-turn-helix transcriptional regulator	181,576 - 182,805	1230	409
	FH036_17010	MBL fold metallo-hydrolase	179,749 - 181,128	1380	459		KFL51884.1	BGC0001711	30.0	29.4%	65.0
	FH036_17005	SagB/ThcOx family dehydrogenase	178,667 - 179,752	1086	361		AAA26364.1	BGC0000567	32.0	70.9	121.0	RiPP:LAP
	FH036_17000	SagB/ThcOx family dehydrogenase	177,559 - 178,653	1095	364		AAA26365.1	BGC0000567	34.0	86.3	164.0	RiPP:LAP
	FH036_16995	SagB/ThcOx family dehydrogenase FMN-binding	176,814 - 177,596	783	260		WP_062148869.1	BGC0002013	37.0	74.6	103.0	WP_000098406.1 SagB_family_peptide_dehydrogenase oxidize the product of the cyclization of thioesters in short polypeptides
	FH036_16990	LAP, biosynthetic protein	175,449 - 176,813	1365	454				99.78%	1	454	WP_000923699.1, YcaO-like family protein [Bacillus cereus group]
	FH036_16985	SagB/ThcOx family dehydrogenase	174,455 - 175,435	981	326				1	1		WP_014481552.1 SagB/ThcOx family dehydrogenase [Bacillus]
	FH036_16980	hypothetical protein	173,154 - 174,443	1290	429				1	1	887	WP_000705618.1 hypothetical protein [Bacillus]
	FH036_16975	MFS transporter	171,852 - 173,117	1266	421		ATO51562.1	BGC0001796	24.0	72.0	88.0
	FH036_16970	IS6 family transposase	171,139 - 171,762	624	55		CAC33842.1	BGC0000523	39.0	83.6	41.0

## Sheet: Table S8
Suppl. Table S8: Gene clusters (BGCs) of the Vietnamese Bacillus cereus group isolates involved in synthesis of other secondary metabolites
	identifier	Product	Location	length		gene	MIBiG hits		similarity			Remark
				NT	AA		protein	cluster	% ID	% coverage	BLAST score
BGC3	CP085498	BGC3 = BGC0000942 (petrobactin), NI siderophore (85%)
petrobactin	FHP23_009620	IucA/IucC family siderophore biosynthesis protein	1,865,738 - 1,867,546	1809	602	asbA	AAP25873.1	BGC0000942	92.0	100.0	1130.0
	FHP23_009625	siderophore biosynthesis protein	1,867,607 - 1,869,445	1839	612	asbB	AAP25874.1	BGC0000942	84.0	99.8	1063.0
	FHP23_009630	3,4-dihydroxybenzoic_acid-AMP_ligase_AsbC	1,869,432 - 1,870,670	1239	412	asbC	AAP25875.1	BGC0000942	93.0	100.0	781.0
	FHP23_009635	petrobactin_biosynthesis_aryl_carrier_protein	1,870,667 - 1,870,933	267	88	asbD	AAP25876.1	BGC0000942	93.0	103.4	154.0
	FHP23_009640	petrobactin_biosynthesis_protein_AsbE	1,870,957 - 1,871,940	984	327	asbE	AAP25877.1	BGC0000942	93.0	100.0	635.0
	FHP23_009645	sugar phosphate isomerase/epimerase	1,871,978 - 1,872,820	843	280	asbF	AAP25878.1	BGC0000942	88.0	100.0	508.0
BGC6	CP085498	BGC6 (betalactone)= plipastatin (BGC0000407)/fengycin(BGC0001095) 40%
betalactone	FHP23_012240	acyl-CoA dehydrogenase	2,408,779 - 2,409,924	1146	381		AEW31025.1	BGC0000407	75.0	99.2	570.0
	FHP23_012245	acetyl-CoA carboxylase biotin carboxylase subunit	2,409,940 - 2,411,277	1338	445		AEW31027.1	BGC0000407	66.0	99.8	589.0	YngH
	FHP23_012250	acetyl-CoA carboxylase biotin carboxyl carrier protein subunit	2,411,304 - 2,411,519	216	71		AAF08803.1	BGC0001103	61.0	93.0	82.0	YngXX
	FHP23_012255	hydroxymethylglutaryl-CoA lyase	2,411,541 - 2,412,452	912	303	mvaB	ABS74198.1	BGC0001095	51.0	98.7	307.0
	FHP23_012260	enoyl-CoA hydratase	2,412,457 - 2,413,245	789	262		ABS74197.1	BGC0001095	61.0	92.7	275.0	YngF
	FHP23_012265	acyl-CoA carboxylase subunit beta	2,413,248 - 2,414,789	1542	513		ABS74196.1	BGC0001095	79.0	97.5	793.0	YngE
	FHP23_012270	acetyl-coenzyme_A_synthetase	2,414,839 - 2,416,779	1941	646		AAL15617.1	BGC0000270	37.0	46.4	194.0
BGC10	CP085498	BG10 (terpene, hopene)
terpene	FHP23_017675	EamA family transporter RarD	3,457,748 - 3,458,689	942	313		ARO44663.1	BGC0001769	42.0	89.5	199.0
	FHP23_017670	divergent PAP2 family protein	3,457,243 - 3,457,668	426	141
	FHP23_017665	squalene--hopene cyclase	3,455,290 - 3,457,143	1854	617		CAB39697.1	BGC0000663	29.0	101.8	238.0	Terpene
	FHP23_017660	YfhD family protein	3,455,067 - 3,455,216	150	49
	FHP23_017655	3-oxoacyl-ACP reductase FabG	3,454,041 - 3,454,781	741	246	fabG	CAI94720.1	BGC0000141	40.0	99.2	186.0
	FHP23_017650	aldehyde dehydrogenase DhaS	3,452,507 - 3,453,991	1485	494		ABW71833.1	BGC0000303	53.0	97.6	507.0
BGC11	CP085511	BGC11 (CDPS, other) = BGC0002103 pulcherriminic acid biosynthetic gene cluster from Bacillus subtilis subsp. subtilis str. 168 (66%)
pulcherriminic acid	HQJ03_027030	tRNA-dependent cyclodipeptide synthase	126,552 - 127,271	720	239	yvmC	NP_391387.1	BGC0002103	61.0	99.6	293.0	pulcherimminic_acid_precursor
	HQJ03_027025	cytochrome P450, cyclodipeptide synthase-associated	125,296 - 126,516	1221	406	cypX	NP_391386.1	BGC0002103	73.0	99.3	604.0	cyclo-L-leucyl-L-leucyl_dipeptide_oxidase,_pulcheriminic_synthase
	HQJ03_027020	putative transcriptional regulator	124,702 - 125,172	471	156	yvnA	NP_391385.1	BGC0002103	43.0	98.7	130.0
	HQJ03_027015	transcriptional regulator for pulcherriminic acid synthesis	123,940 - 124,416	477	158	yvmB	NP_391388.1	BGC0002103	58.0	98.1	184.0
	HQJ03_027010	pulcherriminic acid efflux transporter	122,668 - 123,882	1215	404	yvmA	NP_391389.1	BGC0002103	58.0	95.5	418.0
		missing in CP085511					NP_391384.1	BGC0002103				putative_exported_hydrolase
BGC24	JABSVB010000018 - Region 2 - ladderane (BGC24)
ladderane	HP573_25640	site-specific integrase	45,793 - 46,953	1161	386							Phage integrase
	HP573_25645	DNA-binding protein	47,303 - 48,280	978	325
	HP573_25650	Fic family protein	48,615 - 49,661	1047	348
	HP573_25655	glycoside hydrolase family 99-like domain-containing protein	49,927 - 50,949,	1023	340
	HP573_25660	ABC transporter ATP-binding protein	50,984 - 51,931	948	315		EDU38312.1	BGC0001170	40.0	99.4	239.0
	HP573_25665	ABC transporter permease	51,952 - 53,109	1158	385
	HP573_25670	acyl-CoA thioesterase	53,119 - 53,538	420	139
	HP573_25675	ACP S-malonyltransferase	53,535 - 54,485	951	316		ADO69377.1	BGC0000044	36.0	93.0	187.0
	HP573_25680	3-oxoacyl-[acyl-carrier-protein] reductase	54,478 - 55,224	747	248	fabG	ALG65299.1	BGC0001297	45.0	98.0	209.0
	HP573_25685	acyl carrier protein	55,280 - 55,576	297	98		ANY57965.1	BGC0001369	48.0	84.7	90.0
	HP573_25690	3-hydroxyacyl-ACP dehydratase FabZ	55,573 - 56,058	486	161	fabZ	ANY57966.1	BGC0001369	44.0	98.8	127.0
	HP573_25695	GNAT family N-acetyltransferase	56,055 - 59,171	3117	1038
	HP573_25700		59,168 - 60,472	1305	434		QBK46624.1	BGC0001960	22.0	101.8	71.0
	HP573_25705	aminomethyl transferase family protein	60,465 - 61,508	1044	347
	HP573_25710	beta-ketoacyl-ACP synthase II	61,521 - 63,977	2457	818		ANY57968.1	BGC0001369	38.0	99.3	543.0	MtcI_Ketosynthase_KS:KS*
	HP573_25715	glucose-1-phosphate thymidylyltransferase RfbA	64,102 - 64,968	867	288	rfbA	AAR99610.1	BGC0000794	75.0	99.7	439.0	Saccharide
	HP573_25720	dTDP-4-dehydrorhamnose 3,5-epimerase	64,994 - 65,560	567	188	rfbC	AAR99611.1	BGC0000794	59.0	97.3	226.0	Saccharide
	HP573_25725	dTDP-glucose 4,6-dehydratase	65,557 - 66,513	957	318	rfbB	AAR99612.1	BGC0000794	68.0	99.7	474.0	Saccharide
	HP573_25730	dTDP-4-dehydrorhamnose reductase	66,559 - 67,407	849	282	rfbD	AAR99613.1	BGC0000794	50.0	97.5	292.0	Saccharide
	HP573_25735	TP-binding cassette domain-containing protein	67,679 - 68,072,	394	65		ACY56716.1	BGC0000600	77.0	100.0	93.0
BGC31	JABSVB010000023 - Region 1 - nucleoside (BGC31)
nucleoside	HP573_27130	hypothetical protein	14,610 - 15,173	564	187
	HP573_27125	hypothetical protein	13,584 - 14,579	996	331
	HP573_27120	methyltransferase domain-containing protein	11,715 - 13,415	1701	566		ACQ63634.1	BGC0000875	27.0	39.6	81.0	Saccharide:Hybrid/tailoring saccharide+Other:Nucleoside
	HP573_27115	ABC transporter ATP-binding protein	10,003 - 11,595	1593	530		AGM16415.1	BGC0000400	29.0	92.6	153.0
	HP573_27110	ABC transporter ATP-binding protein	8,284 - 9,984	1701	566		CAA90021.1	BGC0000543	28.0	95.8	177.0
	HP573_27105	phosphotransferase	7,206 - 8,261	1056	351
	HP573_27100	nucleoside, biosynthetic protein	6,279 - 7,022,	744	247		ADZ45330.1	BGC0001020	27.0	76.1	82.0	putative_nucleotidyltransferase
	HP573_27095	hypothetical protein	5,010 - 6,254	1245	414		ADZ45331.1	BGC0001020	35.0	84.1	210.0	putative_glycosyltransferase
	HP573_27090	HAD family hydrolase	4,185 - 4,991	807	268		AKQ99294.1	BGC0001484	23.0	95.1	61.0	hydrolase
	HP573_27085	hypothetical protein	2,619 - 4,169	1551	516		QMW30126.1	BGC0002248	24.0	52.3	53.0
	HP573_27080	IS200/IS605 family element transposase accessory protein TnpB	1,953 - 2,312	360	119
	HP573_27075	transposase	1,227 - 1,384	158	27
BGC32	VEPR01000027 - Region 2 - furan (BGC32)
furan	FHR08_23635	IS200/IS605 family element transposase accessory protein TnpB	63,702 - 64,823	1122	373
	FHR08_23630	nucleotidyltransferase domain-containing protein	63,090 - 63,476	387	128
	FHR08_23625	HEPN domain-containing protein	62,690 - 63,103	414	137
	FHR08_23620	phosphoadenosine phosphosulfate reductase	62,068 - 62,565	498	166
	FHR08_23615	orf1 (RiPP/helix-turn-helix transcriptional regulator	60,656 - 61,009	354	117		AAB91592.1	BGC0000559	42.0	81.2	85.0	WP_000917567.1 DNA-binding transcriptional regulator, HxlR family
	FHR08_23610	MFS transporter	58,958 - 60,355	1398	465	mmyR	CAC36763.1	BGC0000914	52.0	93.1	433.0	WP_097796855.1 Methylenomycin A resistance protein
	FHR08_23605	furan, biosynthetical protein (AvrD)	57,568 - 58,560	993	330	MmyD	CAC36757.1	BGC0000914	35.0	101.5	206.0	MCU5759649.1 AvrD family protein [Bacillus cereus]
	FHR08_23600	ATP-binding protein	56,789 - 57,481	693	230	MmyX	CAC36758.1	BGC0000914	62.0	96.1	281.0	WP_001046571.1 ATP-binding protein
	FHR08_23595	NADH:flavin oxidoreductase	55,603 - 56,730	1128	375	MmyE	CAC36756.1	BGC0000914	56.0	100.3	415.0	WP_098300558.1 NADH:flavin oxidoreductase
	FHR08_23590	NAD(P)-dependent oxidoreductase	54,610 - 55,548	939	312		CAI94677.1	BGC0000141	27.0	66.7	61.0	WP_000643934.1 NAD(P)-dependent oxidoreductase
	FHR08_23585	nitroreductase	53,912 - 54,592	681	226	nfnB	WP_098021151.1		1	1	476	nitroreductase [Bacillaceae] nitroreductase similar to Mycobacterium smegmatis
	FHR08_23580	cytochrome P450 óxidase	52,319 - 53,266	948	315		WP_165852351.1	BGC0001089	1	1	647	cytochrome P450 [Bacillus cereus] cytochrome P450 family 107
	FHR08_23575	thiol reductase thioredoxin	51,608 - 51,865	258	8
	FHR08_23570	hypothetical protein	50,855 - 51,232	378	125
	FHR08_23565	hypothetical protein	50,428 - 50,745	318	105
	FHR08_23560	site-specific integrase	49,341 - 50,291	951	316
