# Supplementary material for: Plant-Associated Representatives of the <em>Bacillus cereus</em> Group Harbor a Rich Biosynthetic Potential of Antimicrobial Compounds and are Efficient in Suppressing Plant Pathogens
Source: Preprints.org preprint supplement (doi:10.20944/preprints202310.0635.v2), 2023-10-11
Supplement: Supplementary file 1 [file supplementary]

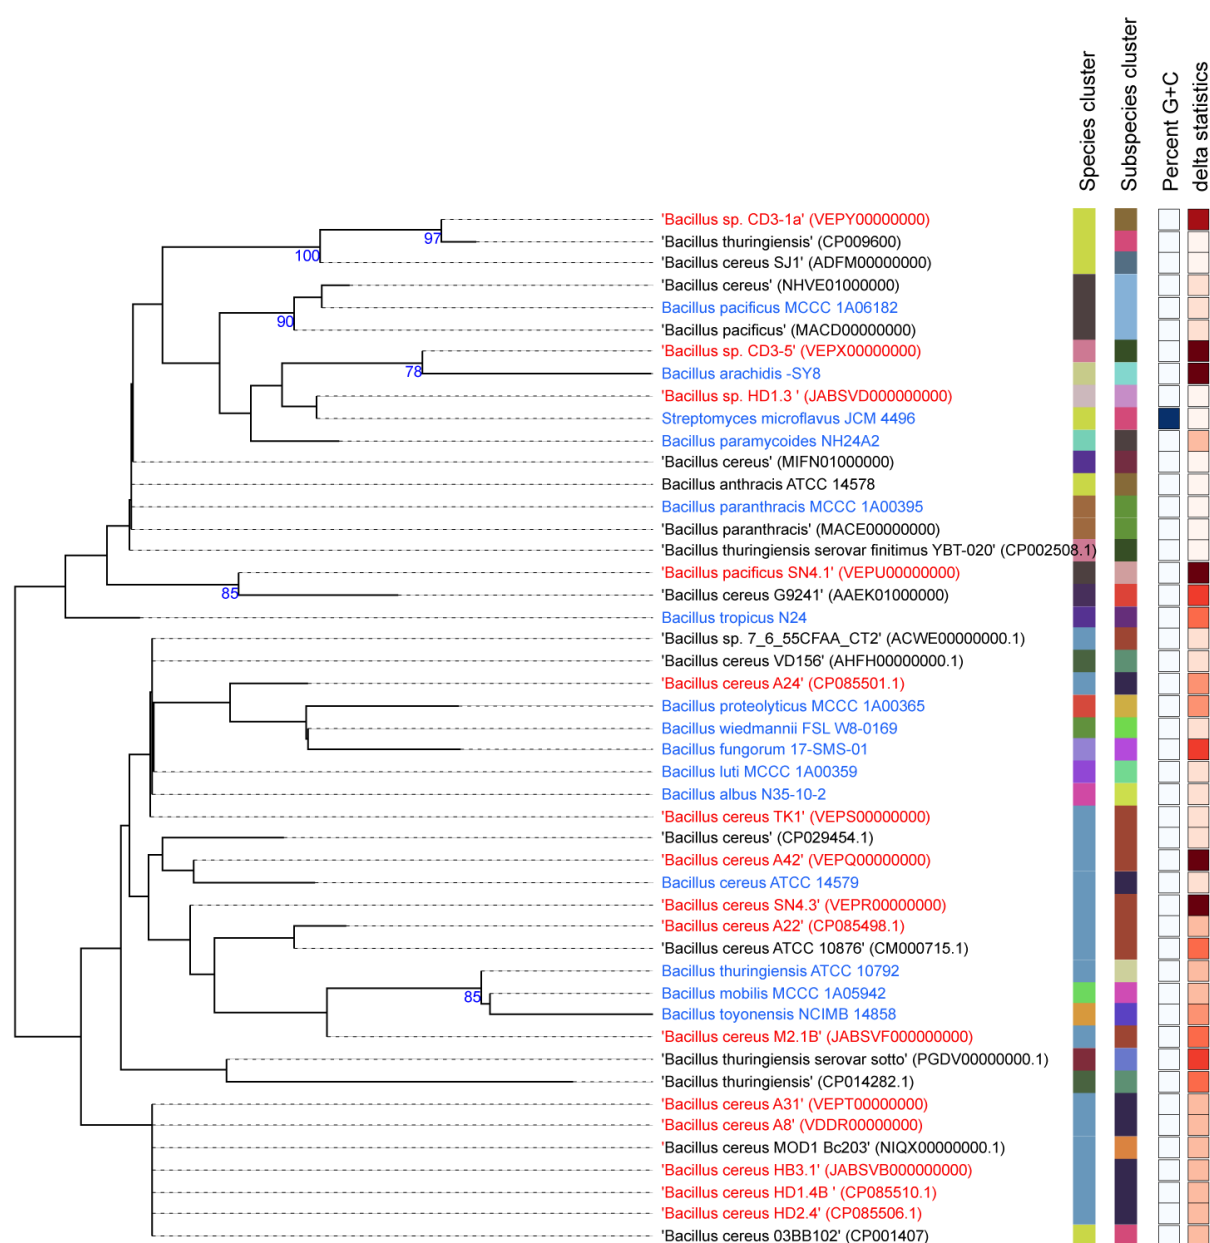

**Suppl. Figure S1:** Tree inferred with FastMe 2.1.6.1 from GBDP distances calculated from 16S rDNA gene sequences. The branch lengths are scaled in terms of GBDP distance formula  $d_5$ . The numbers above branches are GBDP pseudo-bootstrap support values >60% from 100 replications, with an average branch support of 28.5%. The tree was rooted at the midpoint. The 17 Vietnamese crop plant isolates are indicated by red letters. Type strains are indicated by blue letters.

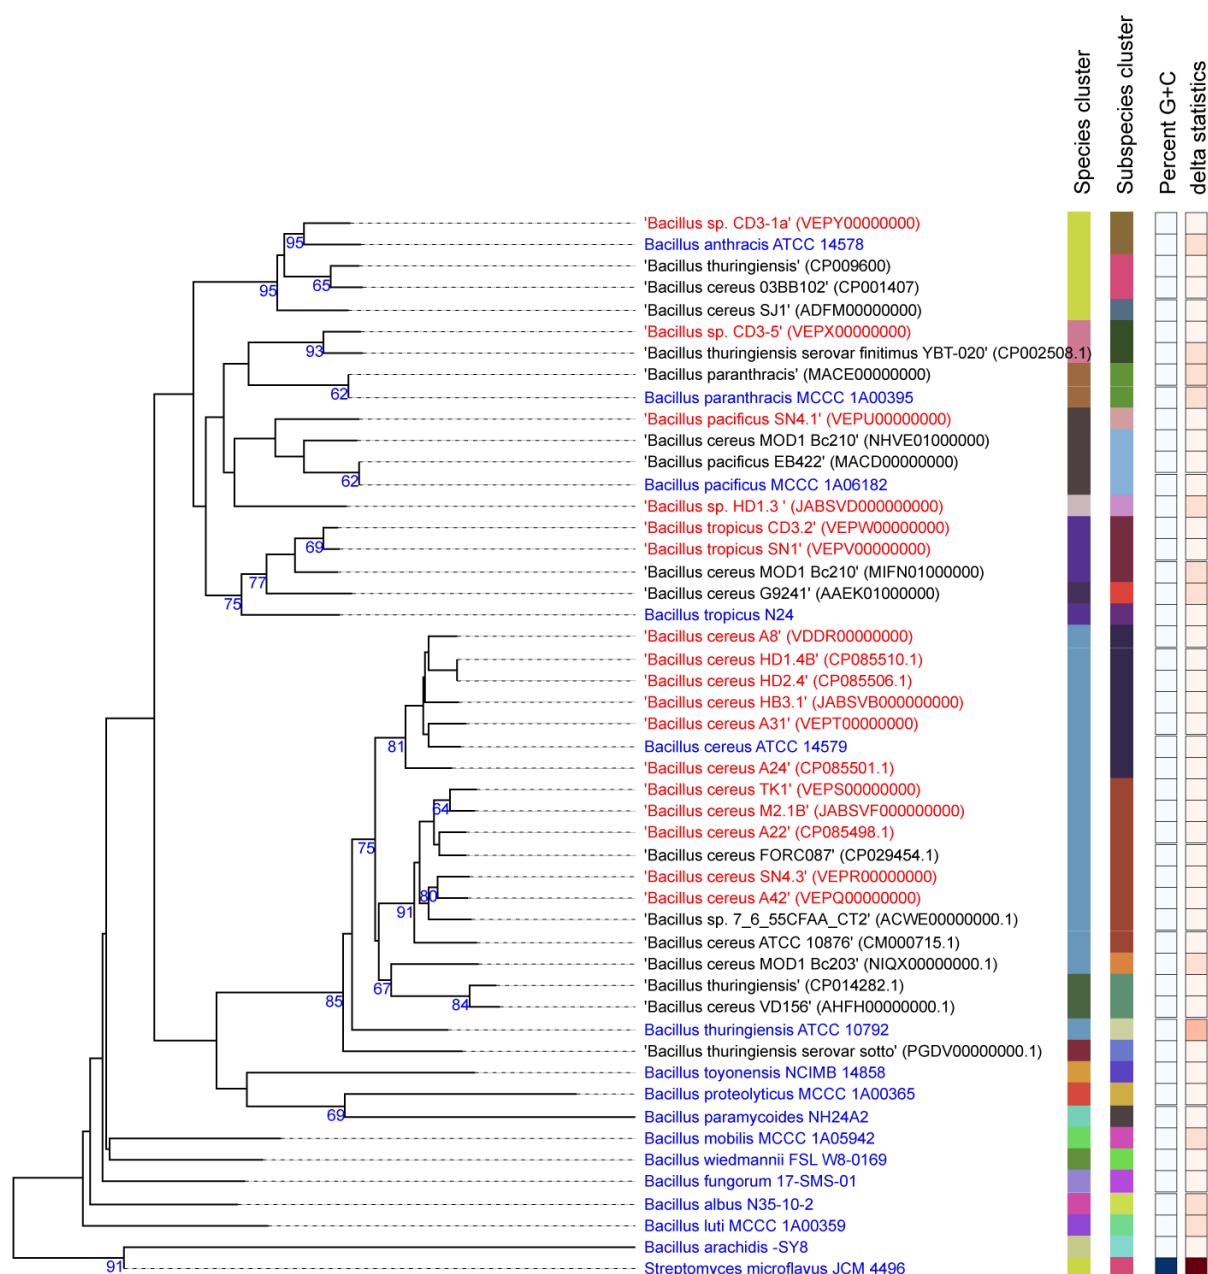

**Suppl. Figure S2.** GBDP tree (whole genome sequence based) inferred with FastMe 2.1.6.1 from GBDP distances calculated from genome sequences. The branch lengths are scaled in terms of GBDP distance formula  $d_5$ . The number above branches are GBDP pseudo-bootstrap support values > 60% from 100 replications, with an average branch support of 52.7%. The tree was rooted at the midpoint. The 17 Vietnamese crop plant isolates are indicated by red letters. Type strains are indicated by blue letters.

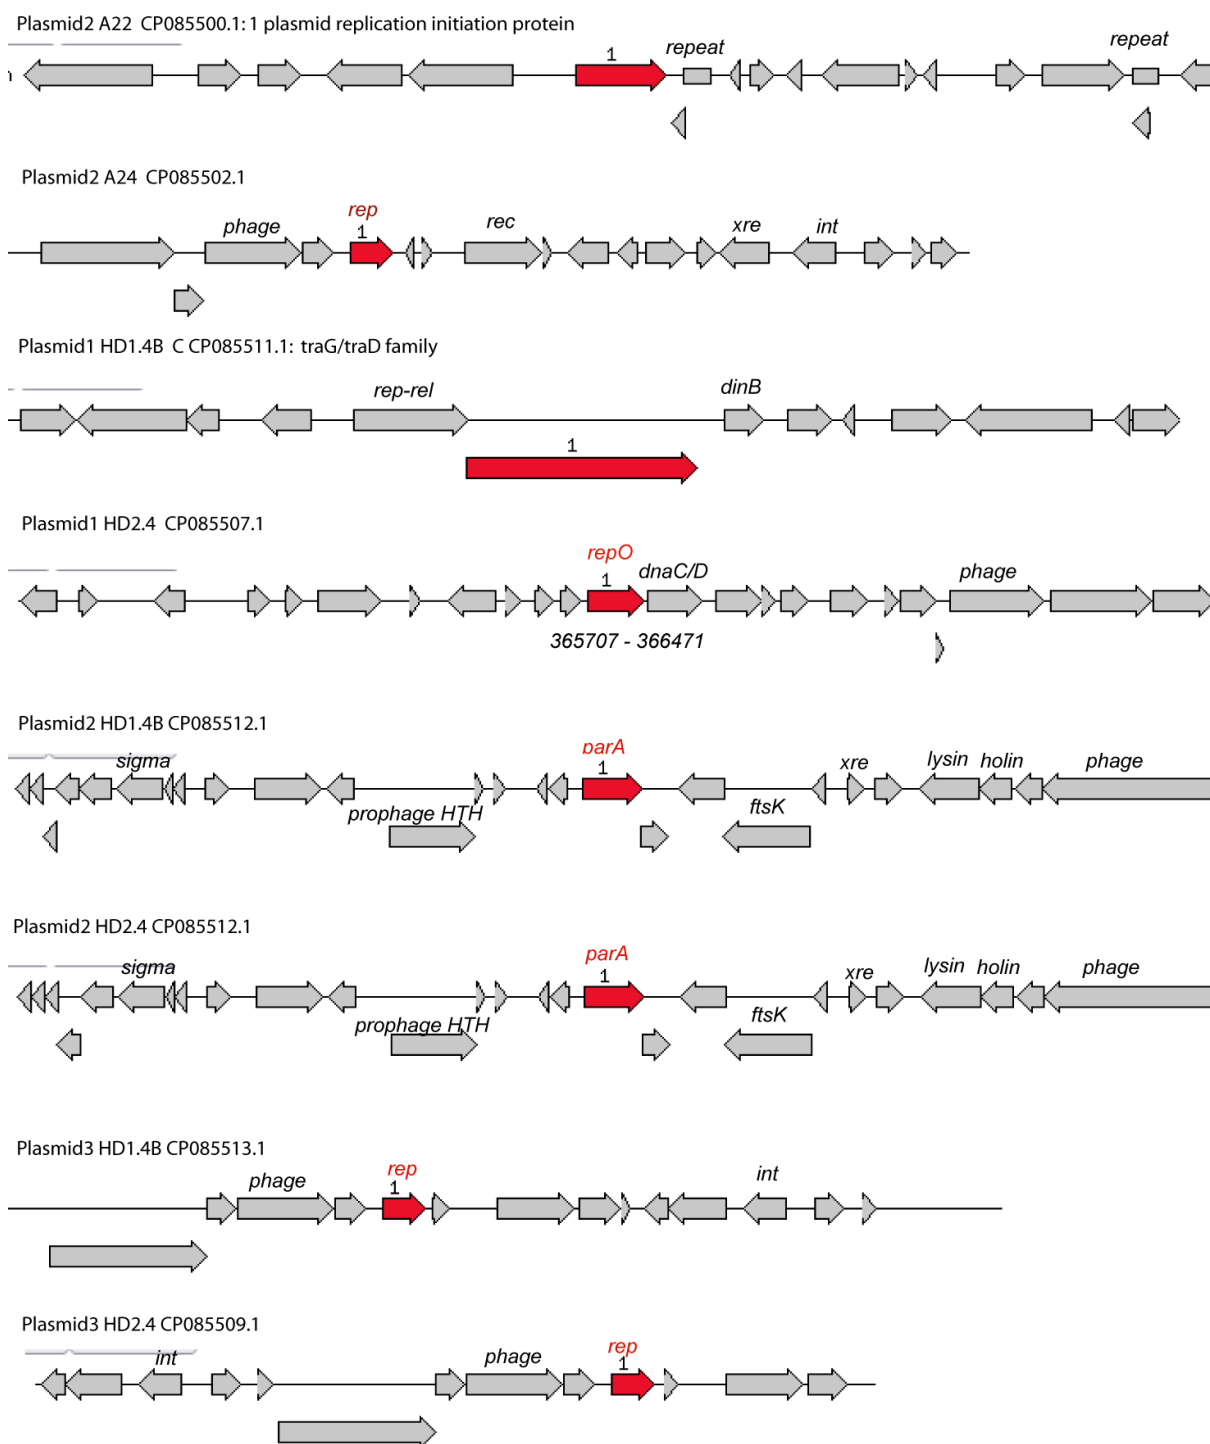

**Suppl. Figure S4.** Environment of the Rep protein genes in the plasmid sequences of A22, A24, HD1.4B, and HD2.4.

**A22 chromosome CPo85498: Cytotoxin K (1) , 4, sulfate permeases**

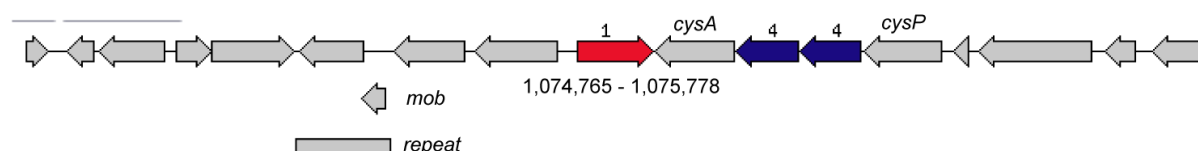

**A22 chromosome CPo85498: Non-hemolytic enterotoxin 1,732,559 - 1,736,153**

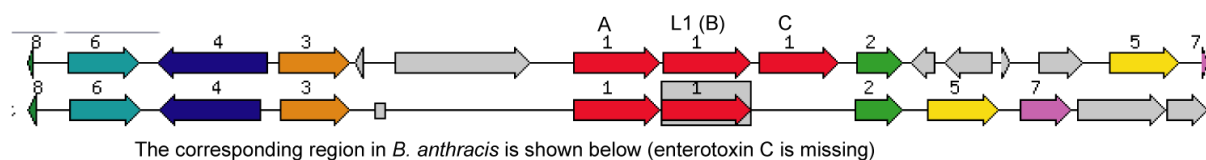

**A22 chromosome CPo85498: Hemolytic endotoxin HBL 3,004,503 - 3,200,081**

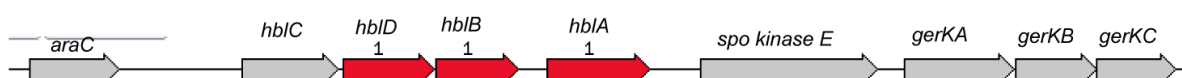

**Plasmid1 HD2.4 CP085507.1: 1: non-hemolytic enterotoxin A 2: NHE lytic component L1 2: Hemolytic enterotoxin**

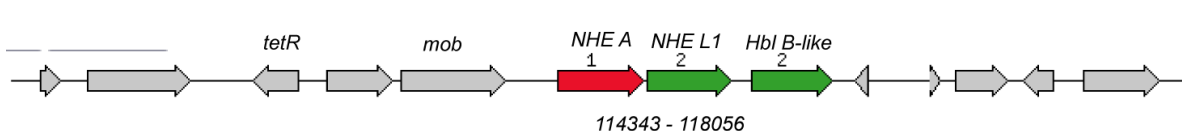

**Plasmid1 HD2.4 CP085507.1: 1: Phosphatidylinositol-specific phospholipase C (EC 4.6.1.13)**

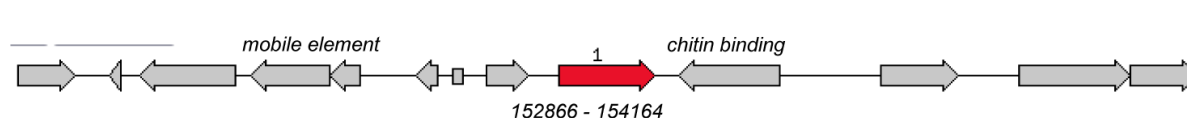

**Plasmid1 HD2.4 CP085507.1: 1: pXO1-73 lysophospholipid acyltransferase**

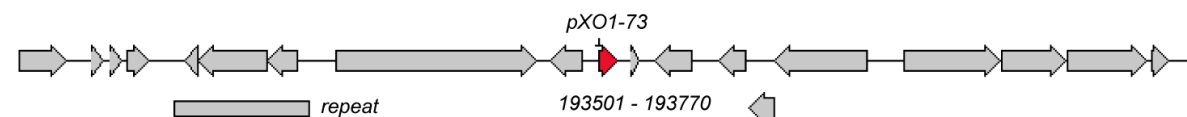

**Plasmid 2 A22 CP085500.1: 1: pXO2-44**

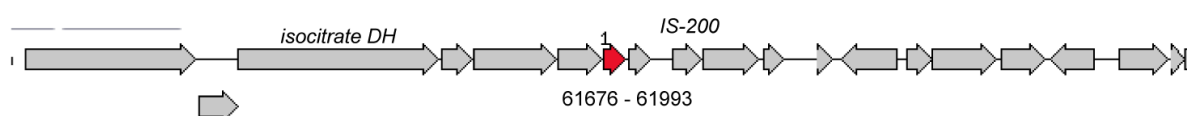

**Plasmid1 A24 CP085502.1 : 1: hemolysin and related proteins containing CBS domains 2: chitin binding proteins, 3 pOX1-73, 4: glycosyl hydrolase**

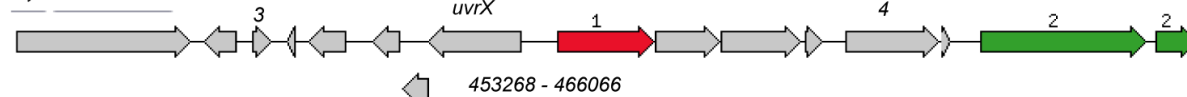

**Suppl. Figure S5.** Localization of virulence genes and gene clusters on chromosomes and plasmids of *B. cereus* isolates. The *cytK* gene and the NHE/HBL gene clusters were chromosomally localized. The complete set of NHE and HBL genes was chromosomally localized in all four completely sequenced strains (A22, A24, HD1.4B, HD2.4). The P1 plasmid sequences of HD1.4B and HD2.4 harbored genes with similarity to the NHE/HBL enterotoxin family.

**Plasmid1 A22 CP085499.1 : Myo-inositol catabolic operon:** 1: 5-keto-2-deoxygluconokinase EC2.7.1.92, 2: transcriptional regulator IolR, 3: alpha-ketoglutarate permease, 4: myo-inositol-2-dehydrogenase, EC 1.1.1.18 (iolG) 5: malonate-semialdehyde dehydrogenase EC 1.2.1.18 (iolA), 6: 3D-trihydroxy,cyclohexane-1,2-dione hydrolase EC3.71.22, 7: inosose dehydratase EC 4.2.44,8: KDGP aldolase EC 4.1.2.29, 9: 5-deoxy-glucuronate isomerase EC 5.3.1.30 (myo inositol catabolic operon)

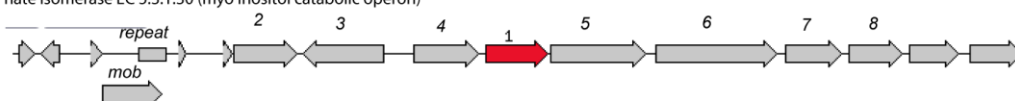

**Plasmid1 A22 CP085499.1 : Anthrose biosynthetic operon:** 1: O acetyl transferase, 2: hypothetical proteins, 3: SAM-dependent methyltransferase, 4: Enoyl CoA hydratase, 5: glycosyl transferase, 6: aminotransferase, 7: methyltransferase, 8: glycosyltransferase (anthrose biosynthesis)

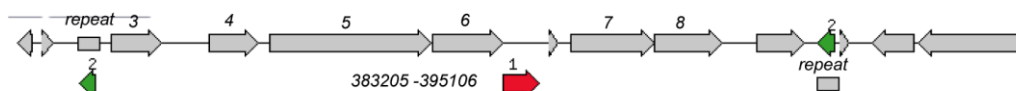

**Plasmid1 A24 CP085502.1 : gluconate operon** 1: phospho gluconate dehydrogenase, 2: conserved proteins, 3 repressor, 4 gluconokinase, 5: gluconate permease,.

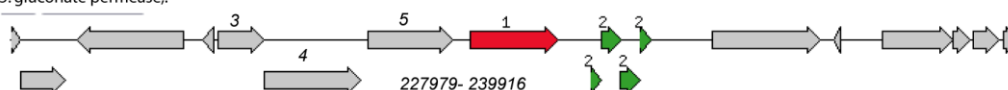

**Plasmid1 HD2.4 CP085507.1: 1: pulcherriminic acid synthase (EC1.14.15.13), 2: Cyclodileucine synthase (EC2.3.2.22)**

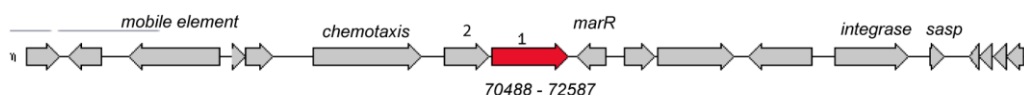

**Plasmid1 HD2.4 CP085507.1: 1: bacteriocin cerein 7B precursor**

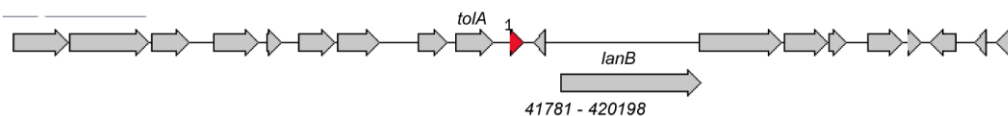

**Plasmid1 HD2.4 CP085507.1: 1: Thumolycin synthase**

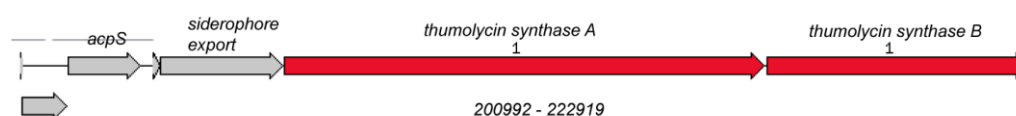

**Plasmid1 A24 CP085502.1 : type 1 restriction modification system:** 1: restriction subunit M (EC2.1.1.72), 2: restriction subunit R (EC3.1.21.3), 3 subunit S

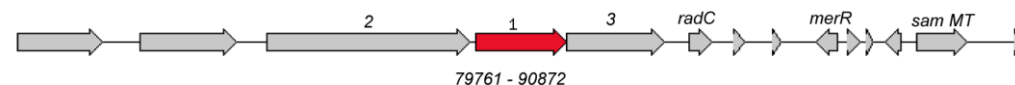

**Plasmid 2 A22 CP085500.1: 1: type I restriction modification subunit restriction**

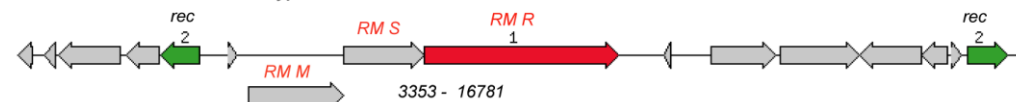

**Plasmid1 HD1.4B CP085511.1: 1: type III restriction modification subunit methylation**

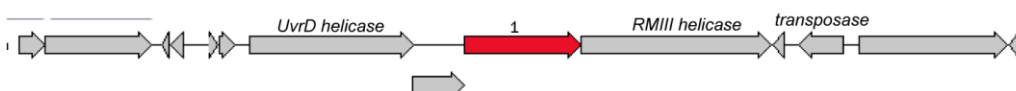

**Suppl. Figure S6:** Plasmid encoded catabolic operons, biosynthetic gene clusters (BGCs) and restriction/modification systems.

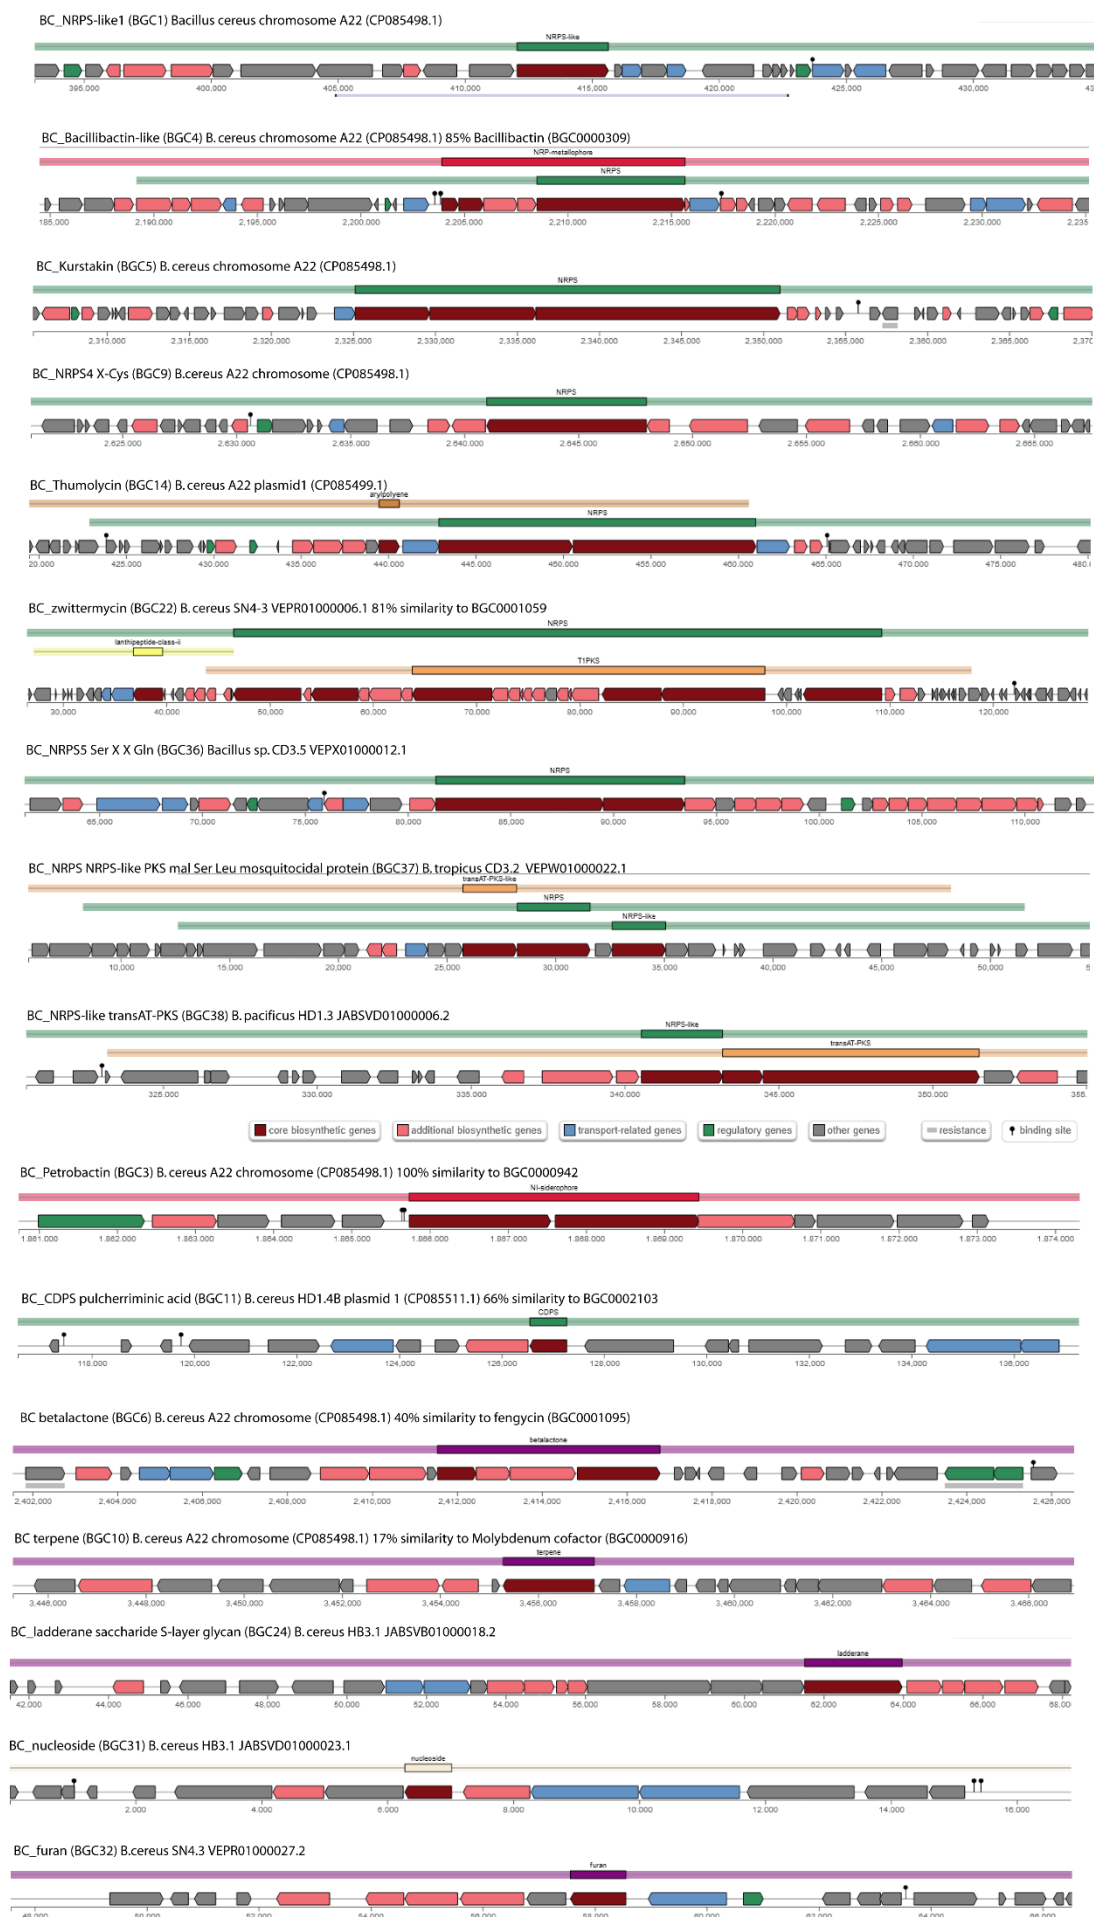

**Suppl. Figure S7.** BGCs in the *B. cereus* group isolates encoding NRPS/NRPK and other secondary metabolites

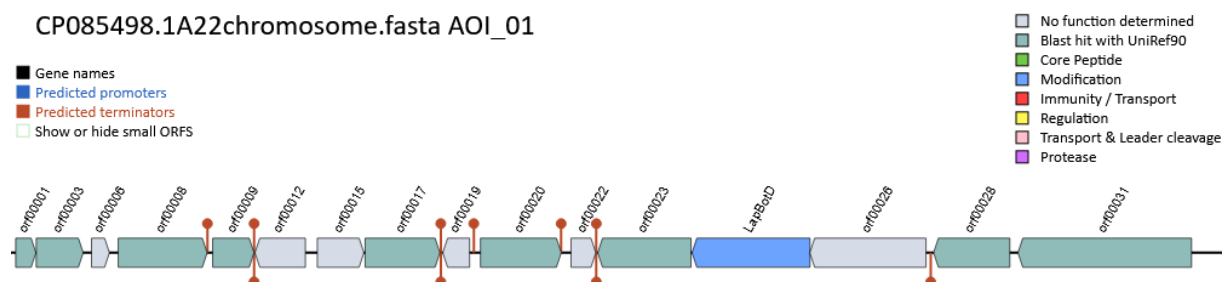

The LAPBotD gene cluster located within the A8 node 12, the A22 chromosome from 1,203,959 – 1,223,959, the A24 chromosome from 4,003,443-4,009,306.

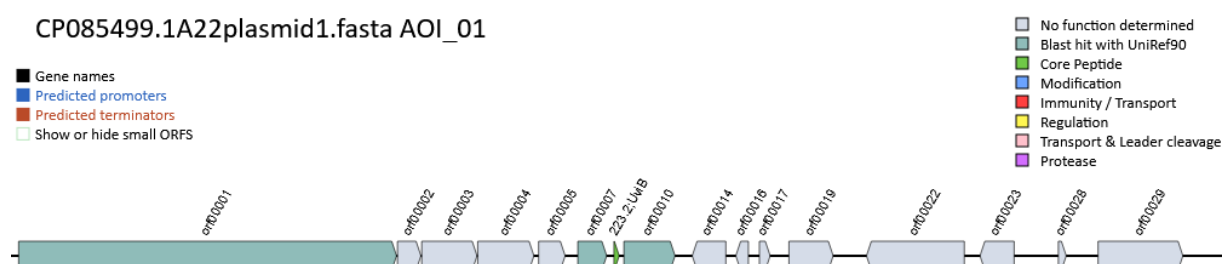

UviB (223.2) located within the A22 chromosome from 350679– 350766. The UviB core peptide sequence is: MLFITQKKNEQCEEQYQAVIQKNQEVEIE

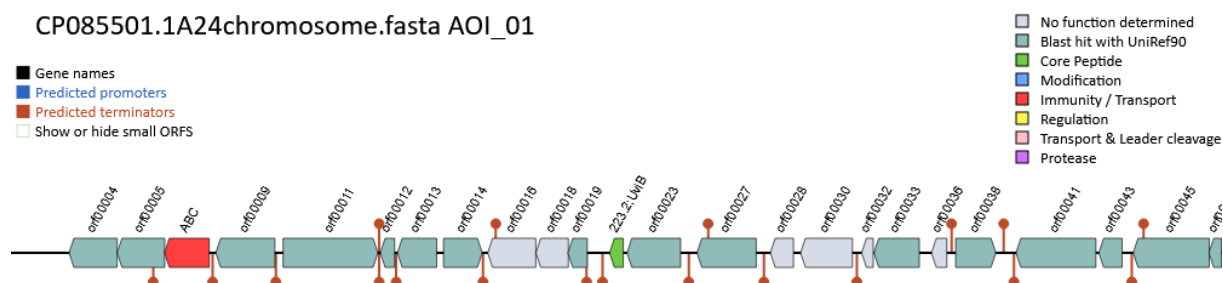

UviB (223.2) located within the A24 chromosome from 1,060,832-1081057. The UviB prepeptide sequence MEEQIFNSMIQQGAFALFVWMLFTTQKKNEQREEQYQKVIEKNQQVIEEQAKAFSSLSKDL SDVKKRILGNDDK is identical with *Bacillus thuringiensis* serovar israelensis ATCC35

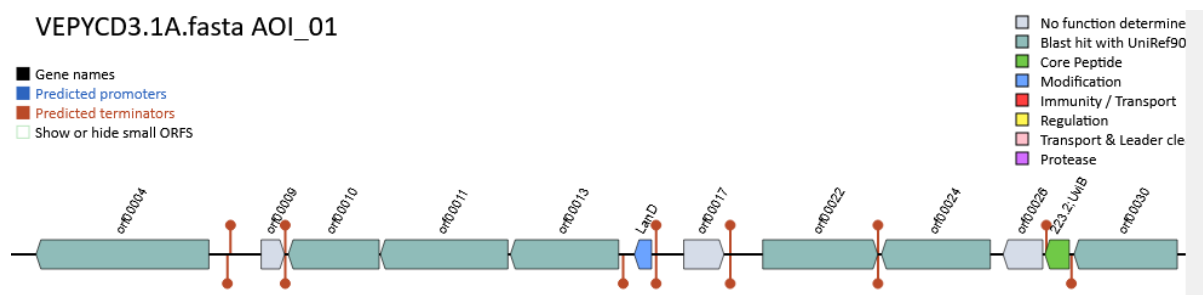

### UviB (223.2)/LanD located in *Bacillus* sp. CD3.1A VEPY 12.1.

**Query** VKTVEEQIFNSMIQQGAF AALFVWMLFTTQKKNEQREAQYQAVIQKNQEVIEEQAKAFGSISKDVTEIKQQIFAD  
+EEQIFNSMIQQGAF AALFVWMLFTTQKKNEQRE QYQ VI+KNQ+VIEEQAKAF S+SKD++++KQ+I +

**UviB** MEEQIFNSMIQQGAF AALFVWMLFTTQKKNEQREEQYQKVIEKNQVIEEQAKAFSSLSKDLSDVKQKILGNGDEK

#### JABSVFM2.1B.fasta AOI\_01

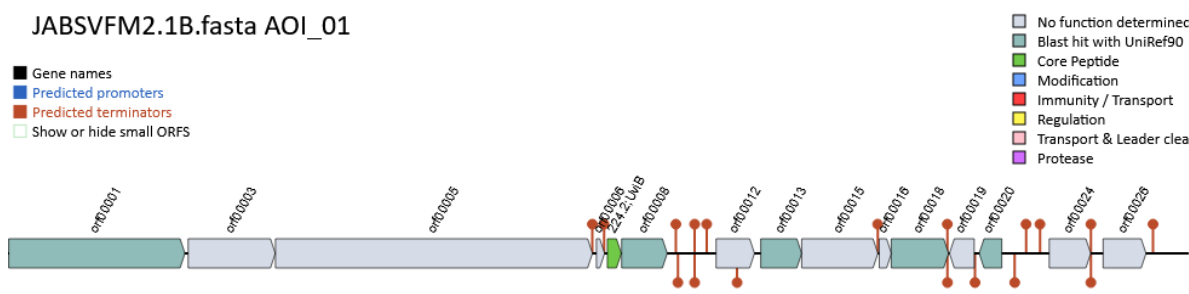

### UviB (224.2) located within *B. cereus* M2.1B JABSVF 20. Weak similarity to *B. thuringiensis* sv *israelensis* ATCC35.

**Query** MLEQLAQVGLKEGIFALLFIWLLVDTKKESKEREDKLYNFLDGMKDEF SKLVHNYESLSSDVEDIKNDI  
M EQ+ +++G FA LF+W+L T+K++++RE++ ++ +D +K + LS DV +IK I

**UviB** MEEQIFNSMIQQGAF AALFVWMLFTTQKKNEQREEQYQKVIEKNQDVITKQAEAFGDLSDVSEIKQKILGSGDVQ

#### JABSVFM2.1B.fasta AOI\_01

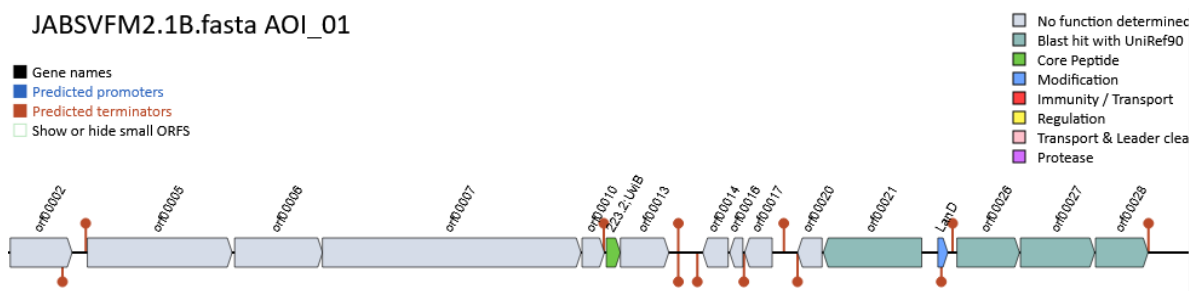

### UviB (223.2) located within *B. cereus* M2.1B JABSVF 1. Similar to *B. thuringiensis* sv *israelensis* ATCC35.

**Query** MRTVEDAIFNSVIQQGAF AALFVWMLFTTQKKNEQREEKYQQVIDRNQQVIEEQAKAFGSISKDVTEIKQKLF-EGD  
+E+ IFNS+IQQGAF AALFVWMLFTTQKKNEQREE+YQ+VI++NQQVIEEQAKAF S+SKD++++KQK+ GD

**UviB** MEEQIFNSMIQQGAF AALFVWMLFTTQKKNEQREEQYQKVIEKNQVIEEQAKAFSSLSKDLSDVKQKILGNGDEK

#### CP085507.1HD2.4plasmid1.fasta AOI\_01

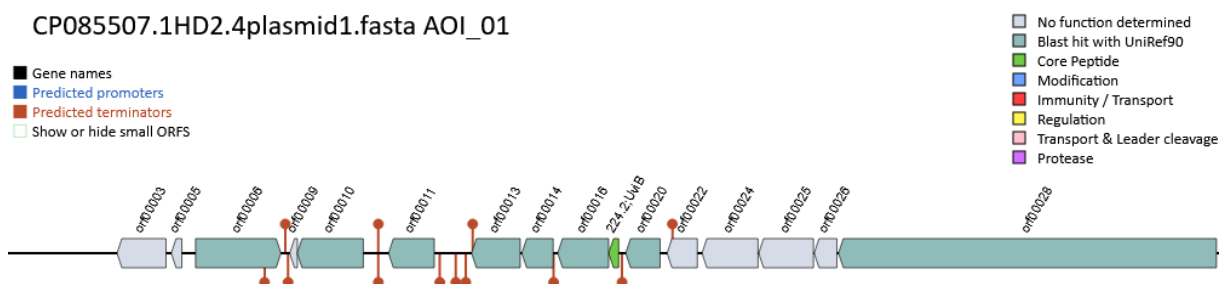

### BhlA/UviB (224.2) holin like peptide [WP\\_098328186.1](#) in HD2.4 plasmid 1. Weak similarity with *Bacillus thuringiensis* serovar *israelensis* ATCC35



## CP085503.1plasmid2.fasta AOI\_01

■ Gene names  
 ■ Predicted promoters  
 ■ Predicted terminators  
 □ Show or hide small ORFs

□ No function determined  
 ■ Blast hit with UniRef90  
 ■ Core Peptide  
 ■ Modification  
 ■ Immunity / Transport  
 ■ Regulation  
 ■ Transport & Leader cleavage  
 ■ Protease

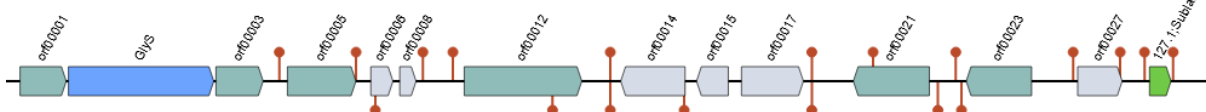

**Query** MKDLFKELKVEELDKHTGHGGMGWAQCAALLAQCSSGGRIGCGGTATQAYGQCNTYRKMC  
 M+ LFKE+K+EEL+ G G+G AQCAAL QC+SGG IGC GG A C YR+ C  
**Sublancin\_168** MEKLFKEVKLEELLENQKG-SGLGKAQCAALWLQCASGGTIGCGGGAV----ACQNYRQFCR

Bridges

Bridges

Sublancin 168 (ComC, subclass glyocin) [PF03047](#) in A24-plasmid 2 from 1,652-12,241.

GlyS: SP beta glycosyltransferase SunS.

## CP085509.1HD2.4plasmid3.fasta AOI\_01

■ Gene names  
 ■ Predicted promoters  
 ■ Predicted terminators  
 □ Show or hide small ORFs

□ No function determined  
 ■ Blast hit with UniRef90  
 ■ Core Peptide  
 ■ Modification  
 ■ Immunity / Transport  
 ■ Regulation  
 ■ Transport & Leader cleavage  
 ■ Protease

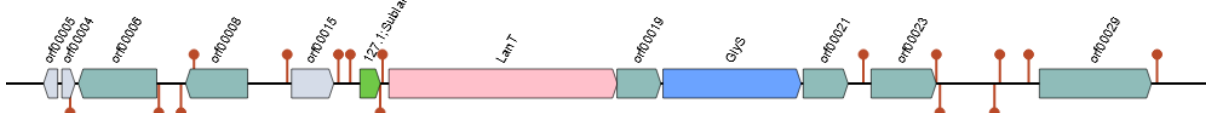

Sublancin 168 (ComC, subclass glyocin) [P68577](#)

/LanT in HD1.4B plasmid 3.

**Query** MKDLFKELKVEELDKHTGHGGMGWAQCAALLAQCSSGGRIGCGGTATQAYGQCNTYRKMC  
 M+ LFKE+K+EEL+ G G+G AQCAAL QC+SGG IGC GG A C YR+ C  
**Sublancin\_168** MEKLFKEVKLEELLENQKG-SGLGKAQCAALWLQCASGGTIGCGGGAV----ACQNYRQFCR

Bridges

Bridges

## JABSVB01HB31.fasta AOI\_01

■ Gene names  
 ■ Predicted promoters  
 ■ Predicted terminators  
 □ Show or hide small ORFs

□ No function determined  
 ■ Blast hit with UniRef90  
 ■ Core Peptide  
 ■ Modification  
 ■ Immunity / Transport  
 ■ Regulation  
 ■ Transport & Leader cleavage  
 ■ Protease

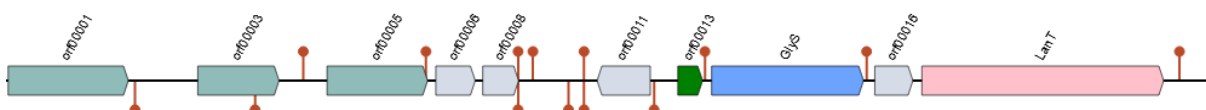

ComC/ GlyS/LanT gene cluster In HB3.1 29.1.

## VEPRSN41.fasta AOI\_01

■ Gene names  
 ■ Predicted promoters  
 ■ Predicted terminators  
 □ Show or hide small ORFs

□ No function determined  
 ■ Blast hit with UniRef90  
 ■ Core Peptide  
 ■ Modification  
 ■ Immunity / Transport  
 ■ Regulation  
 ■ Transport & Leader cleavage  
 ■ Protease

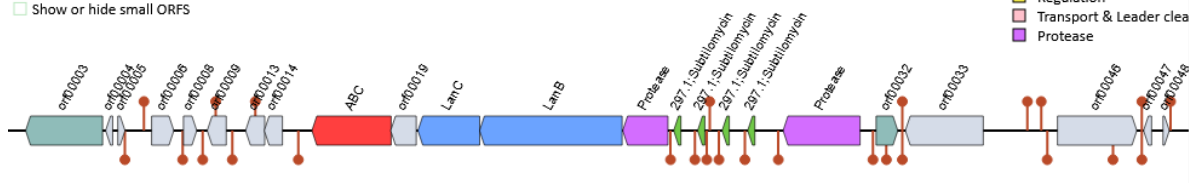

## Subtilomycin (297.1)/LanB/LanC gene cluster in SN4-3 VEPR 27.1.

**Query** MNKELFDLDINKKMETPTMTAQWTIVKV---SKAVCKTGTCT-TSCSNC  
 +FDLDINKKME+ +E++AQTW TI K S C+T TC C+ SCSNC

**Subtilomycin** MEKNNIFDLDINKKMESTSEVSAQTWATIGKTIVQSVKCRFTTCGCSLGS CSNCN

Subclass Lanthipeptide  
 Organism Bacillus subtilis  
 Literature [Reference](#)  
 NCBI [JX912247.1](#)

## VEPRSN41.fasta AOI\_01

■ Gene names  
 ■ Predicted promoters  
 ■ Predicted terminators  
 □ Show or hide small ORFs

□ No function determined  
 ■ Blast hit with UniRef90  
 ■ Core Peptide  
 ■ Modification  
 ■ Immunity / Transport  
 ■ Regulation  
 ■ Transport & Leader cleavage  
 ■ Protease

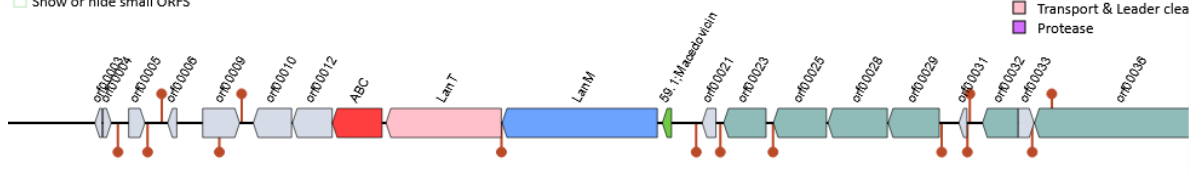

## Macedovicin (59.1)/LanM/LanT gene cluster in SN4-3 VEPR 6.2.

**Query** METEKYLQVVEDEEIEQLVGGVGPWETLTCDPGYKPYACITIAQTII--CKRC  
 E + +++ V D+E+E L+GG GWI+TLTKDCP C AG I CK C

**Macedovicin** MMNATENQIFVETVSDQLEMLIGGADRGWIKTLTKDCPNVISSIC---AGTIITACKNCA

Bridges

Bridges

Bridges

Modifications MMNATENQIFVETVSDQLEMLIGGADRGWIK\***L**\*KDCPNVISSIC---AGTIITACKNCA

Subclass Lanthipeptide B

Organism Streptococcus macedonicus ACA-DC198

Literature [Reference](#)

UniProt [H2A7G5](#)

propeptide 1 - 25

chain Lantibiotic macedovicin 26 - 58

modified residue 2,3-didehydrobutyrine 33

modified residue 2,3-didehydrobutyrine 35

disulfide bond 46 - 54

cross-link Beta-methyllanthionine (Thr-Cys) 33 - 38

cross-link Beta-methyllanthionine (Thr-Cys) 35 - 57

The macedovicin peptide was found identical to bovicin HJ50 and thermophilin 1277.

## CP085507.1HD2.4plasmid1.fasta AOI\_02

■ Gene names  
 ■ Predicted promoters  
 ■ Predicted terminators  
 □ Show or hide small ORFs

□ No function determined  
 ■ Blast hit with UniRef90  
 ■ Core Peptide  
 ■ Modification  
 ■ Immunity / Transport  
 ■ Regulation  
 ■ Transport & Leader cleavage  
 ■ Protease

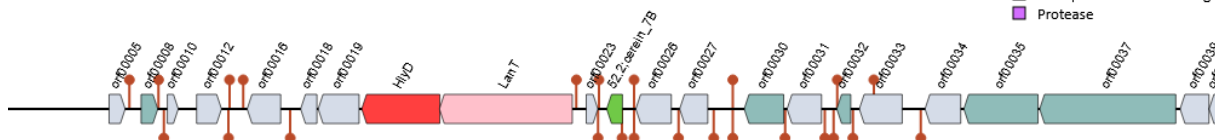

Cerein\_7B (52.2) [Q2MDB2](#)

LanT gene cluster in HD2.4 plasmid 1 from 409,978-430,197

HlyD putative bacteriocin ABC transporter. Cerein\_7B ComC; L\_biotic\_typeA, bacteriocin\_IIC.

## CP085511.1plasmid1.fasta AOI\_02

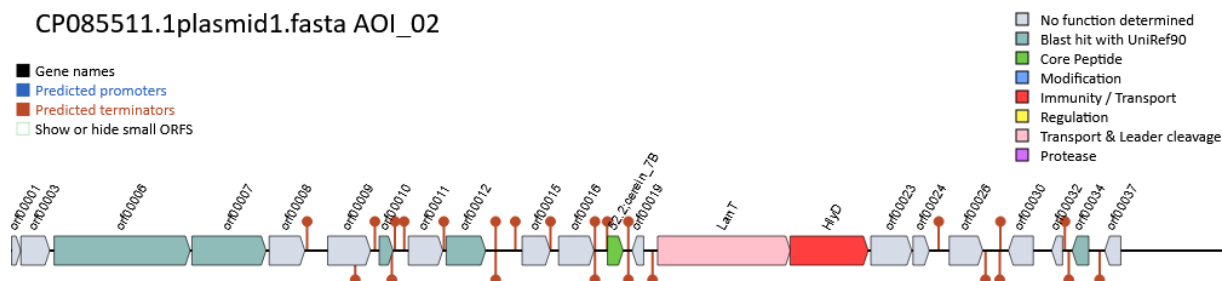

Cerein\_7B (subclass D) gene cluster in HD1.4B) plasmid1 from 270,830-291,049. Q2MDB2. Similar to B. cereus

## VEPRSN41.fasta AOI\_02

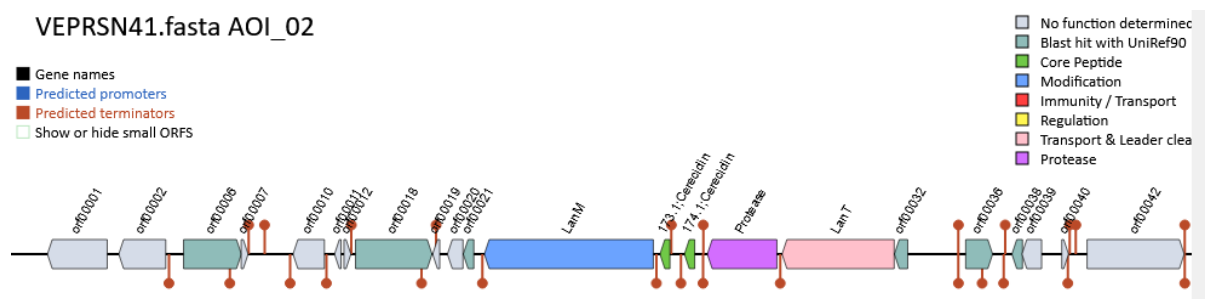

Cerecidin (173.1, 174.1) gene cluster in VEPR 6.1 SN4-3.

Query MNRNQVIEELAVNHPAGAKLVEVSREELTRVYGGGDVQAETTPMTPTLYLNGITIGLALSQSC

NHP+G L E+S EEL + G DVQ ETP+ G+ IG+ S + C

Cerecidin MSKGYKFTKEELVEAWKDPQVREKLKDLPNHPSGKALNELSEEELAEIQGASDVQPETTPLC-----VGVIIGITASIKICK

Subclass Lanthipeptide B

Organism *Bacillus cereus*Literature [Reference](#)NCBI [AHJ59543.1](#)

## VEPS02TK1.fasta AOI\_01

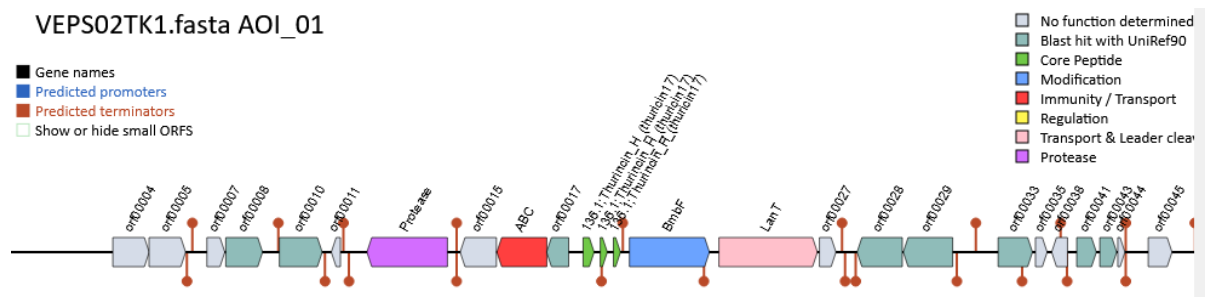

Sactipeptide Thurincin\_H (thuricin 17)/BmbF/LanT gene cluster in M2.1B, JABSVF 11.1, TK1 VEPS 63.1

Query METPVVQPRDWT CWSCLVCAACSVELLNLTAAATGASTAS

METPVVQPRDWT CWSCLVCAACSVELLNLTAAATGASTAS

Thurincin\_H (thuricin17) METPVVQPRDWT CWSCLVCAACSVELLNLTAAATGASTAS

**Subclass** Sactipeptide  
**Organism** *Bacillus thuringiensis*

VEPYCD3.1A.fasta AOI\_01

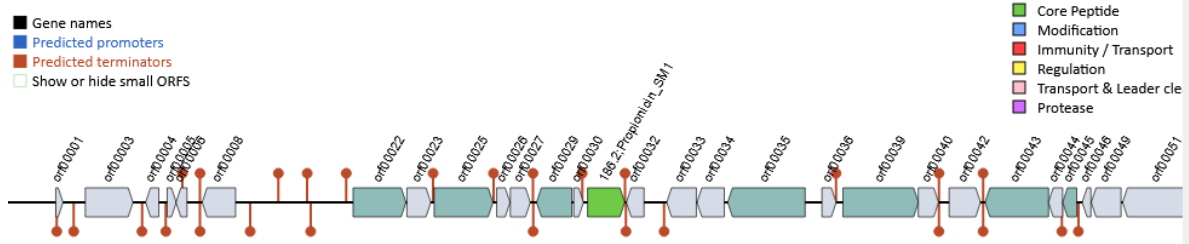

Propionisin (186.2) in *Bacillus* sp. CD3.1A VEPY 16.1. Weak similarity to Propionisin Miescher S, Stierli MP, Teuber M, Meile L. Propionisin SM1, a bacteriocin from *Propionibacterium jensenii* DF1: isolation and characterization of the protein and its gene. *Syst Appl Microbiol.* 2000 Jun;23(2):174-84. doi: 10.1016/S0723-2020(00)80002-8. PMID: 10930068.

VEPYCD3.1A.fasta AOI\_01

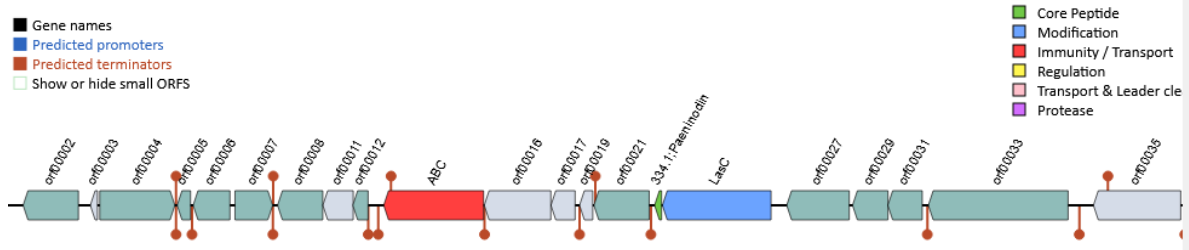

Suppl. Fig. S: Paeninodin (334.1) / LanC/ABC gene cluster in *Bacillus* sp. CD3.1A VEPY 1 and *B. pacificus* HD1,3

**Query** MKKDWTIPTLEVLDINMTMAGPGLKTPDAVQPDIDEVVHY  
 AGPG TPDA QPD DE VHY  
**Paeninodin** AGPGTSTPDAFQPDDEDVHYDS

**Subclass** Lasso peptide  
**Organism** *Paenibacillus dendritiformis* C454

VEPYCD3.1A.fasta AOI\_01

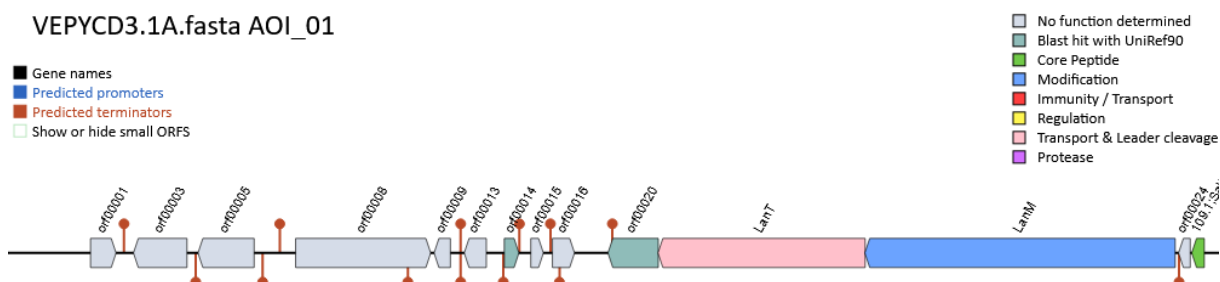

Salivaricin A (109.1)/LanT/ LanM gene cluster in *Bacillus* sp. CD3.1A VEPY 5.1

**Query** MEELKSVVMTVTDEELQE-AAGAAGCGWLCTVTDDCPNSVFVCC  
 L +V+ V+++EL E A G G GW T+TDDCPNSVFVCC  
**SalivaricinA** MERRMSFMKNSKILTNVIEEVSEKELMEVAGGKKGSGWFATITDDCPNSVFVCC

**Subclass** Lanthipeptide B  
**Organism** *Streptococcus pyogenes* MGAS10394

**Suppl. Figure S8.** RiPP gene clusters detected by applying the BAGEL4 software (<http://bagel4.molgenrug.nl/>) in the Vietnamese *Bacillus cereus* group genomes.

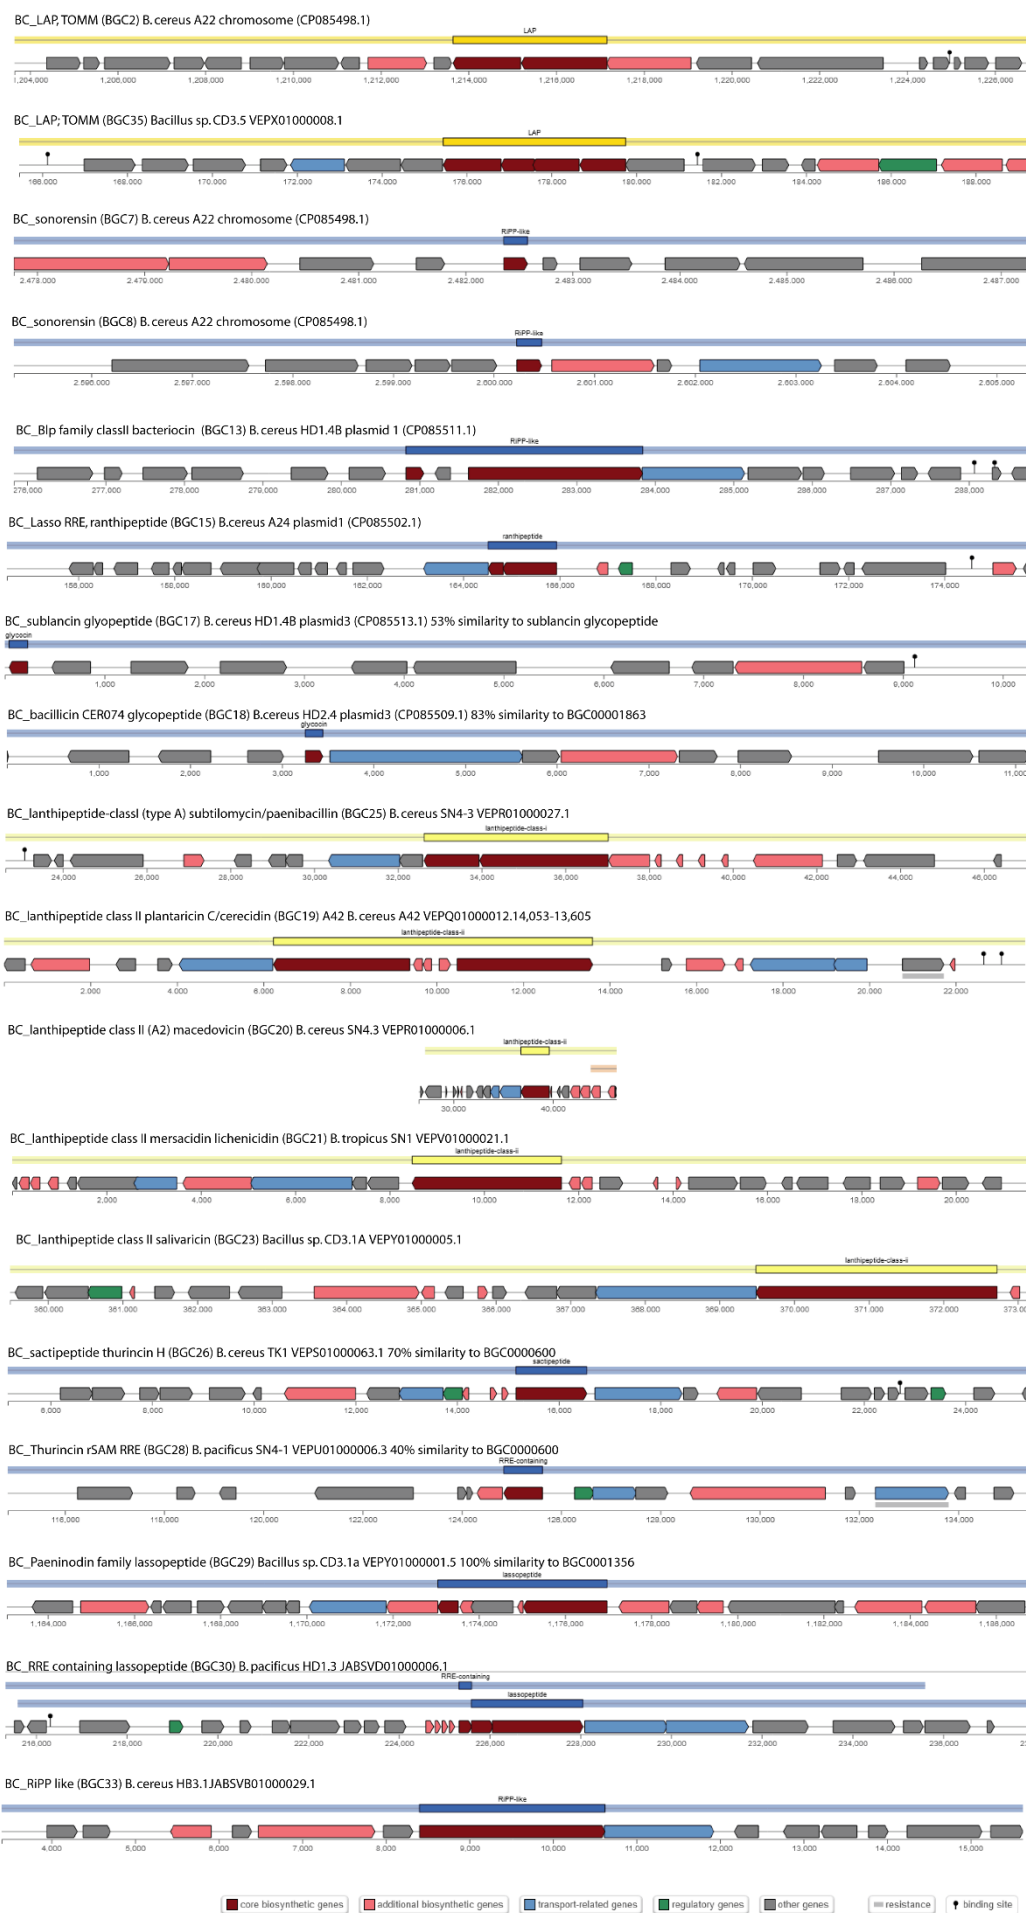

**Suppl. Figure S9:** RiPP gene clusters detected by applying the antiSMASH version 6 software in the Vietnamese *Bacillus cereus* group genomes.
